# Supplementary material for: PIV investigation of high Reynolds number submerged water jets at high-pressure ambient conditions
Source: Springer Nature journal article supplement (doi:10.1007/s00348-021-03167-x), 2021-04-15
Supplement: MOESM2 [file 348_2021_3167_MOESM2_ESM.pdf]

Jasper, S., Hussong, J., Lindken, R.,  
**PIV-Investigation of high-Reynoldsnumber submerged  
water jets at high pressure ambient conditions**  
Exp Fluids (2021), Springer.

### **Supplementary Material B**

- sapphire nozzle SN1
- cavitation numbers  $\sigma = 0.36 - 2.39$
- 2D normalized velocity fields

### **Sarah Jasper**

Bochum University of Applied Sciences  
Institute for Thermodynamics and Fluid Mechanics  
Am Hochschulcampus 1  
44801 Bochum  
Germany  
t: +49 234 32 10432  
e: sarah.jasper@hs-bochum.de

### **Jeanette Hussong**

Technical University of Darmstadt  
Fluid Mechanics and Aerodynamics  
Darmstadt  
Germany

### **Ralph Lindken**

Bochum University of Applied Sciences  
Institute for Thermodynamics and Fluid Mechanics  
Bochum  
Germany

sapphire nozzle SN1

$\sigma = 2.39$

normalized velocity field

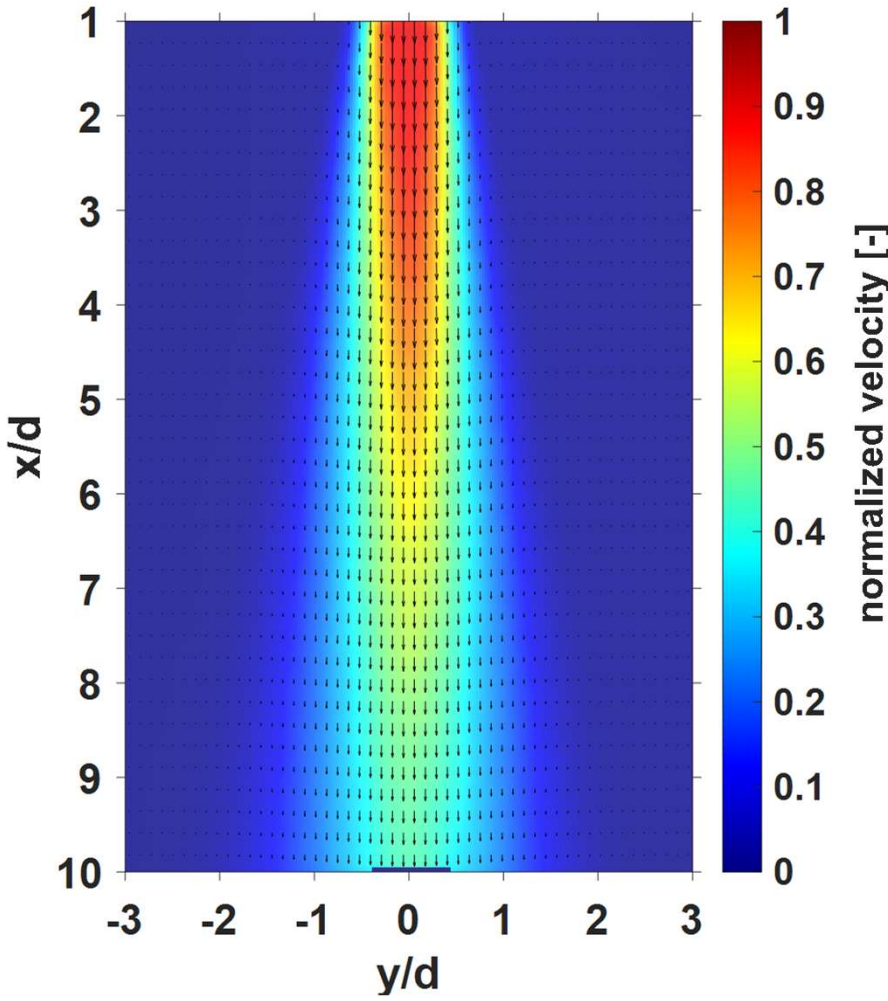

Jasper, S., Hussong, J., Lindken, R.,  
**PIV-Investigation of high-Reynoldsnumber submerged  
water jets at high pressure ambient conditions**  
Exp Fluids (2021), Springer.

sapphire nozzle SN1

$\sigma = 2.13$

normalized velocity field

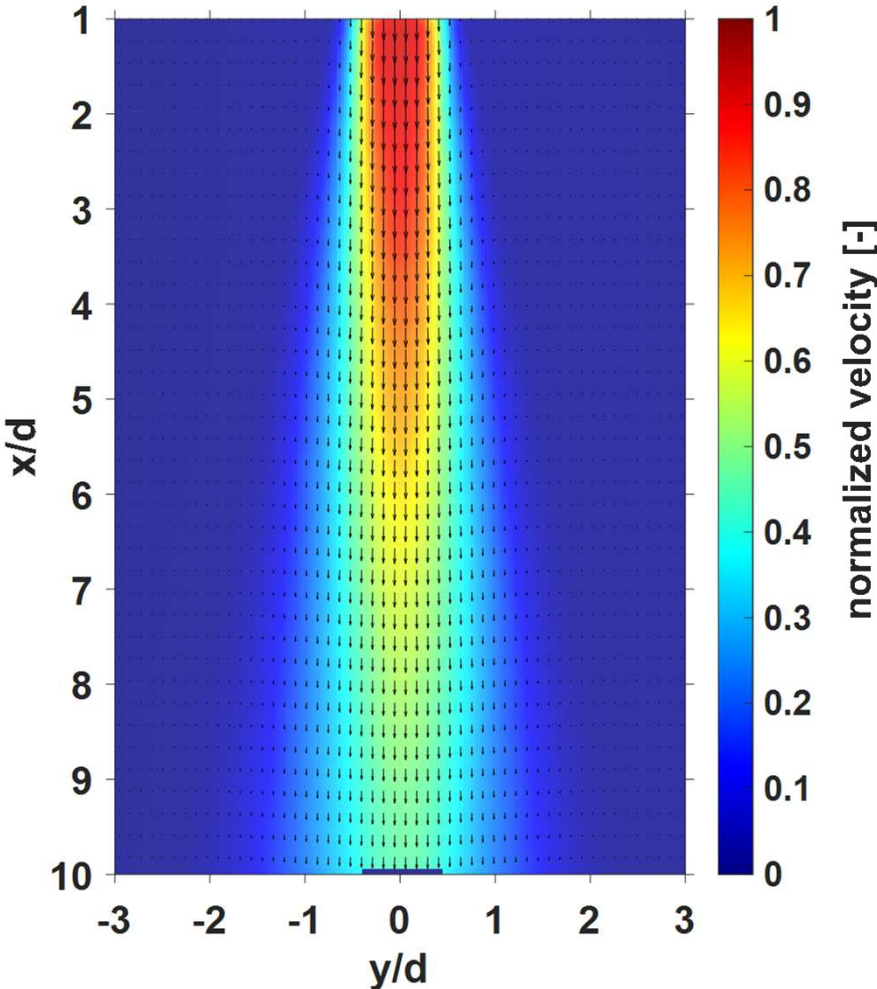

Jasper, S., Hussong, J., Lindken, R.,  
**PIV-Investigation of high-Reynoldsnumber submerged  
water jets at high pressure ambient conditions**  
Exp Fluids (2021), Springer.

sapphire nozzle SN1

$\sigma = 2.01$

normalized velocity field

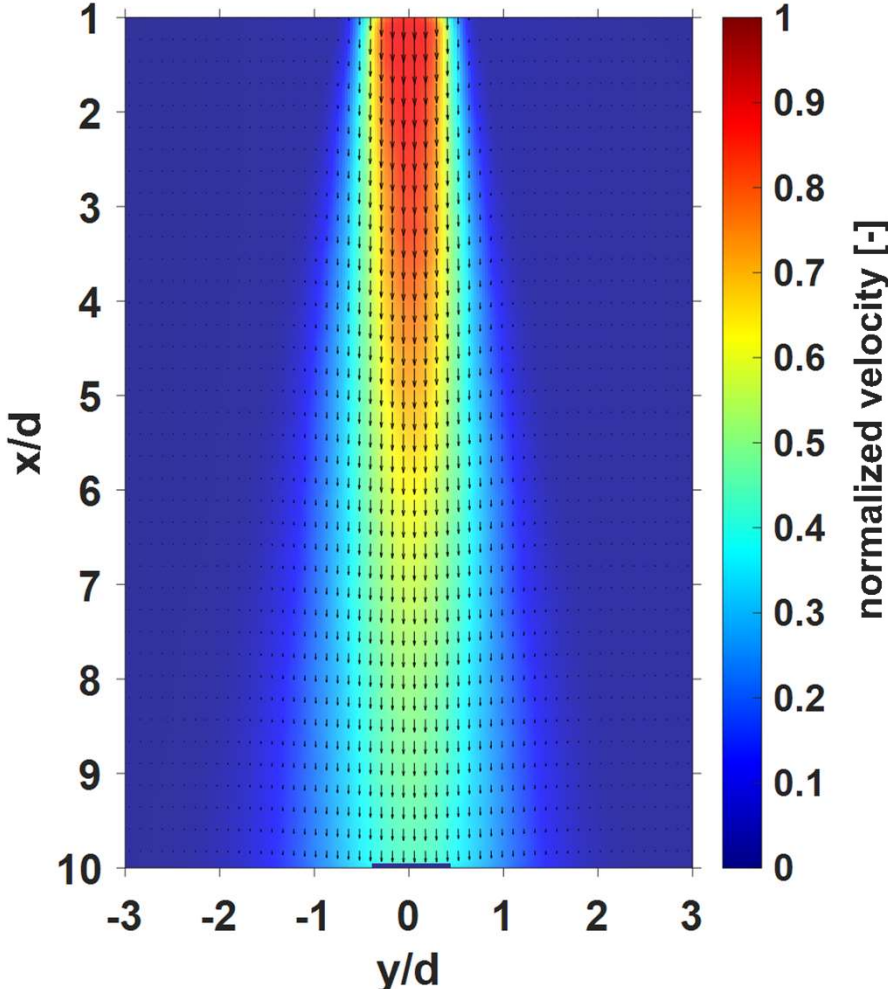

Jasper, S., Hussong, J., Lindken, R.,  
**PIV-Investigation of high-Reynoldsnumber submerged  
water jets at high pressure ambient conditions**  
Exp Fluids (2021), Springer.

sapphire nozzle SN1

$\sigma = 1.78$

normalized velocity field

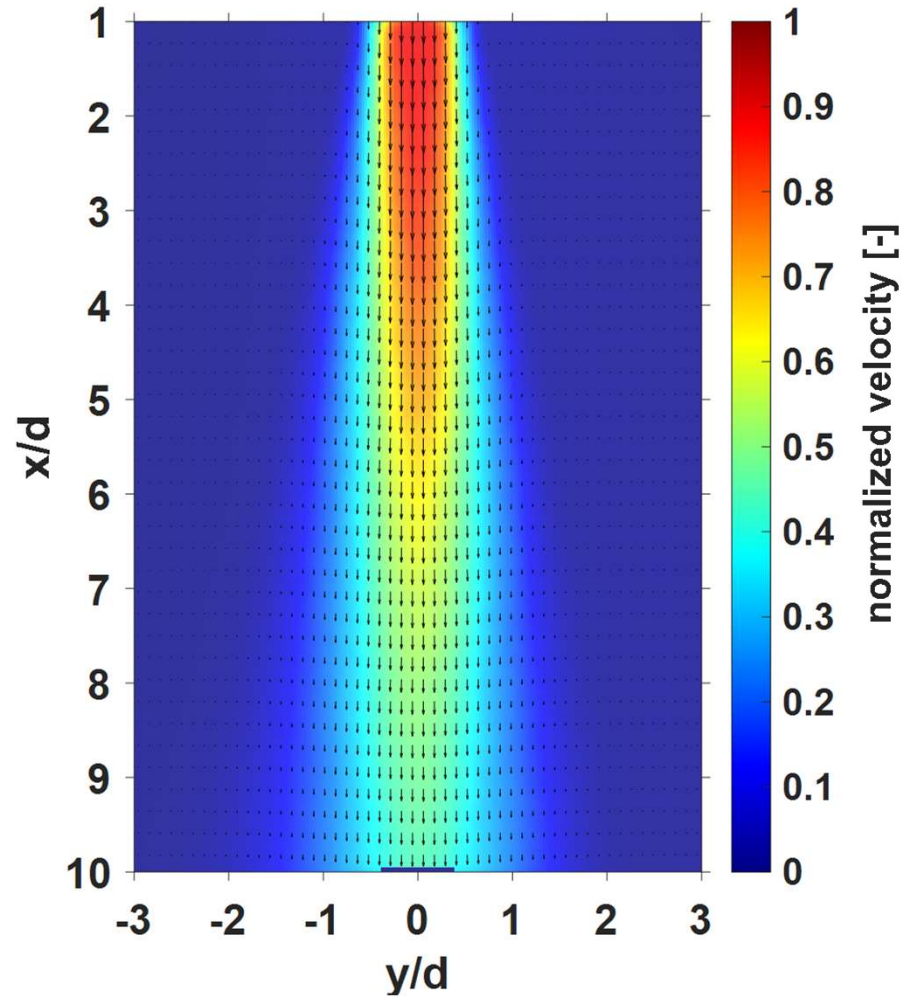

Jasper, S., Hussong, J., Lindken, R.,  
**PIV-Investigation of high-Reynoldsnumber submerged  
water jets at high pressure ambient conditions**  
Exp Fluids (2021), Springer.

sapphire nozzle SN1

$\sigma = 1.62$

normalized velocity field

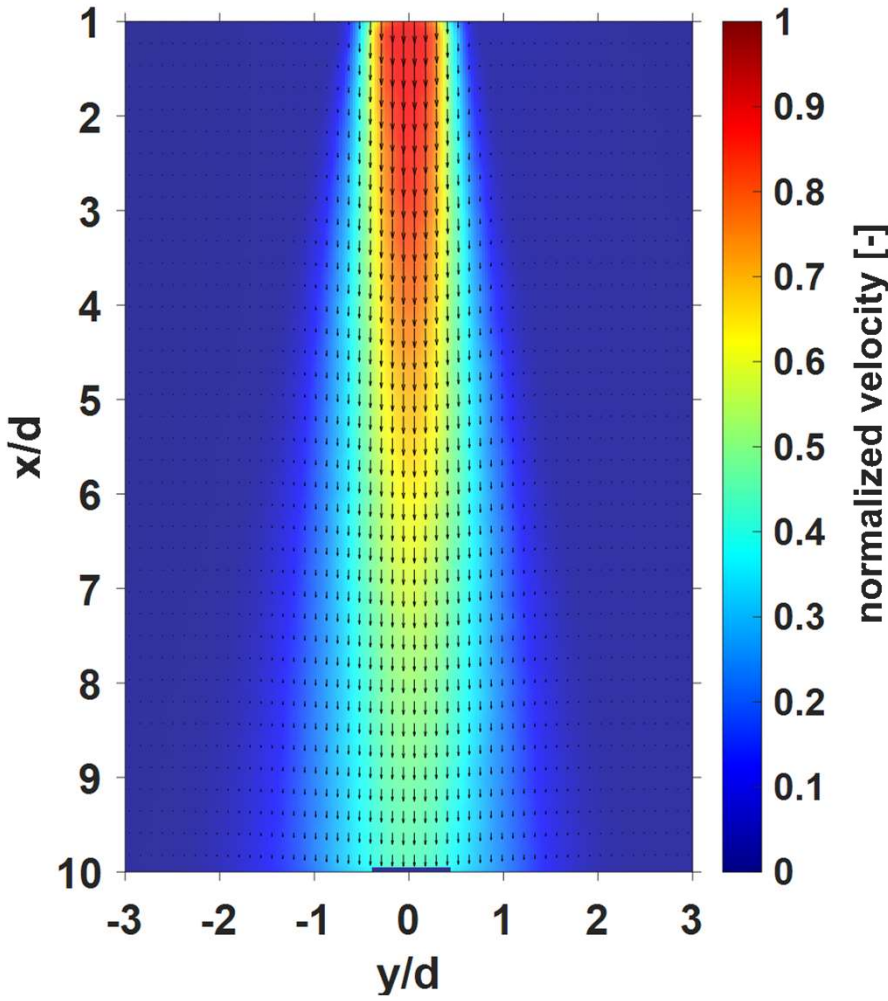

Jasper, S., Hussong, J., Lindken, R.,  
**PIV-Investigation of high-Reynoldsnumber submerged  
water jets at high pressure ambient conditions**  
Exp Fluids (2021), Springer.



sapphire nozzle SN1

$\sigma = 1.53$

normalized velocity field

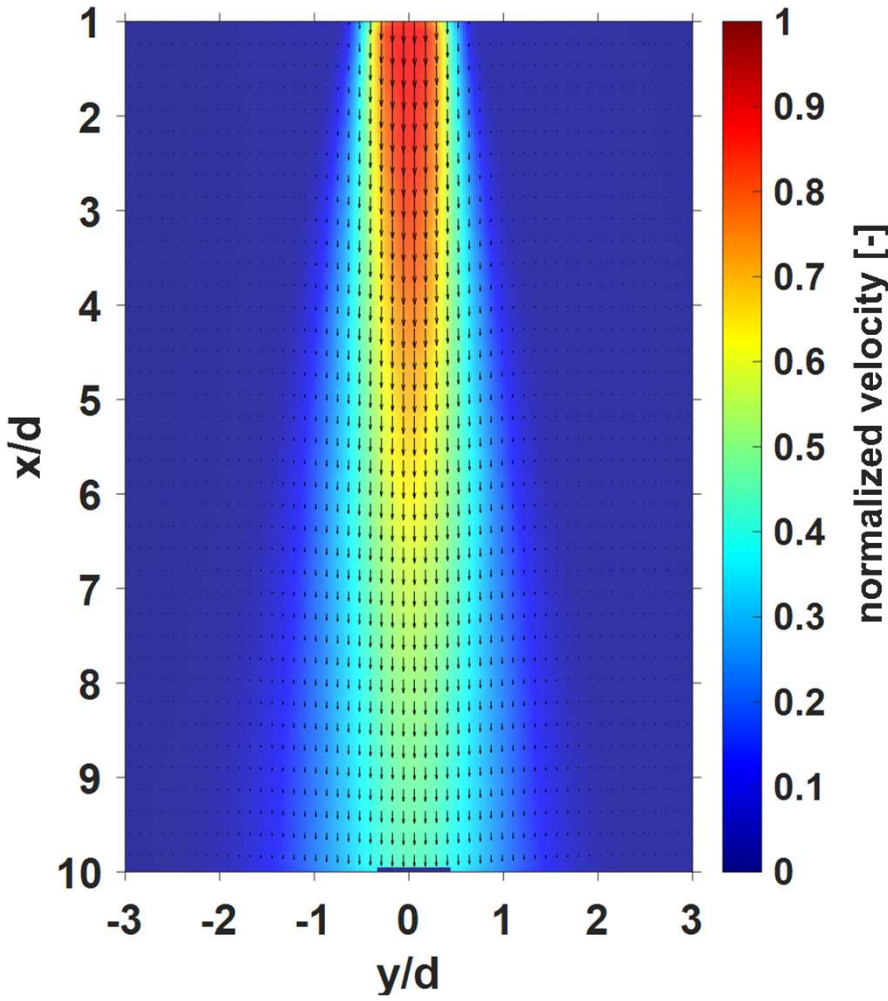

Jasper, S., Hussong, J., Lindken, R.,  
**PIV-Investigation of high-Reynoldsnumber submerged  
water jets at high pressure ambient conditions**  
Exp Fluids (2021), Springer.

sapphire nozzle SN1

$\sigma = 1.42$

normalized velocity field

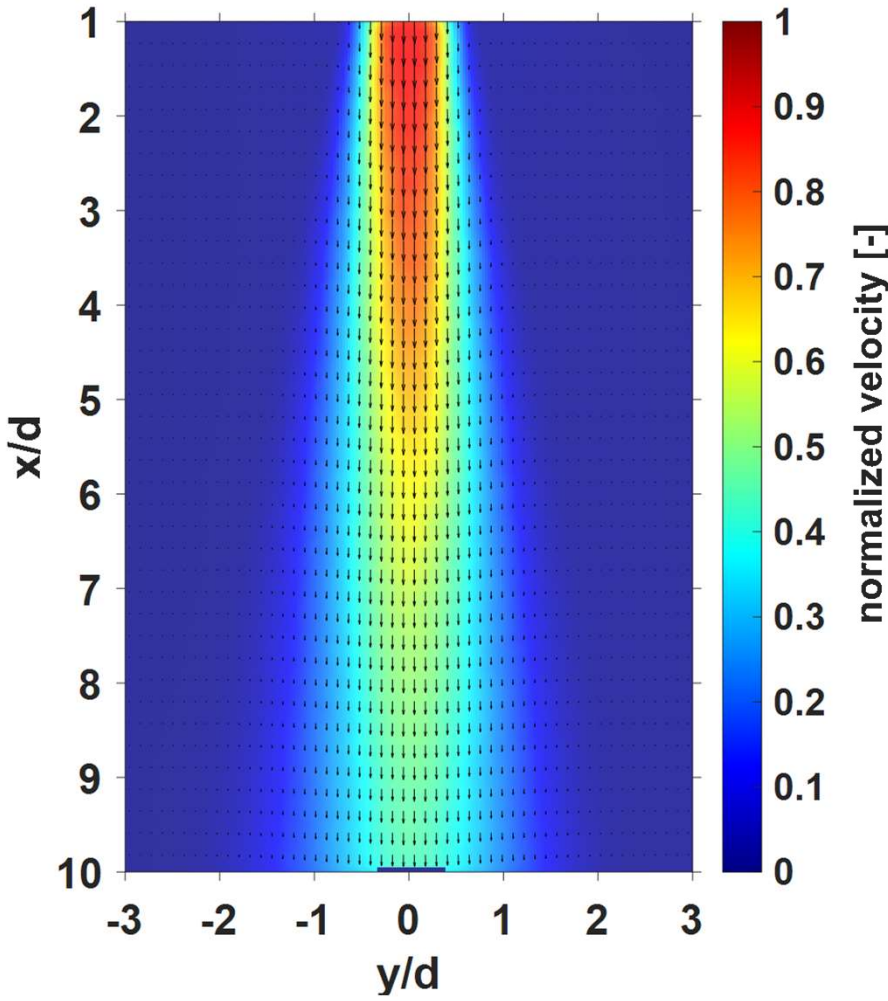

Jasper, S., Hussong, J., Lindken, R.,  
**PIV-Investigation of high-Reynoldsnumber submerged  
water jets at high pressure ambient conditions**  
Exp Fluids (2021), Springer.



sapphire nozzle SN1

$\sigma = 1.29$

normalized velocity field

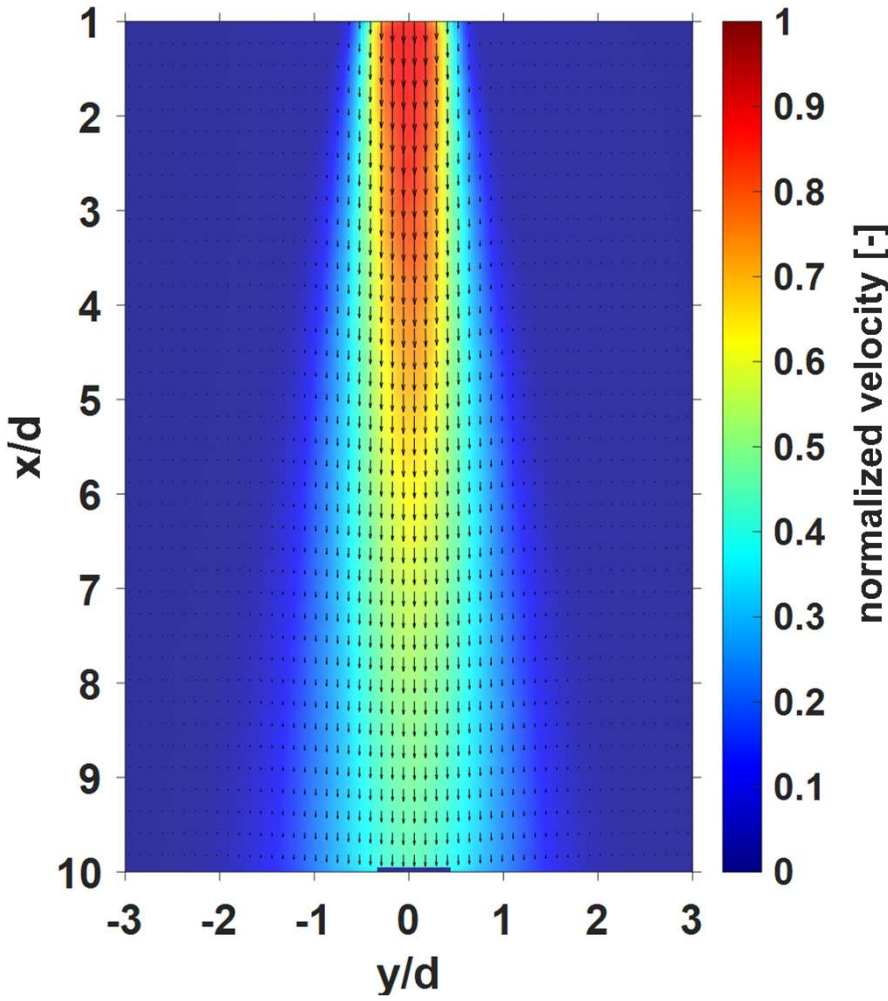

Jasper, S., Hussong, J., Lindken, R.,  
**PIV-Investigation of high-Reynoldsnumber submerged  
water jets at high pressure ambient conditions**  
Exp Fluids (2021), Springer.

sapphire nozzle SN1

$\sigma = 1.18$

normalized velocity field

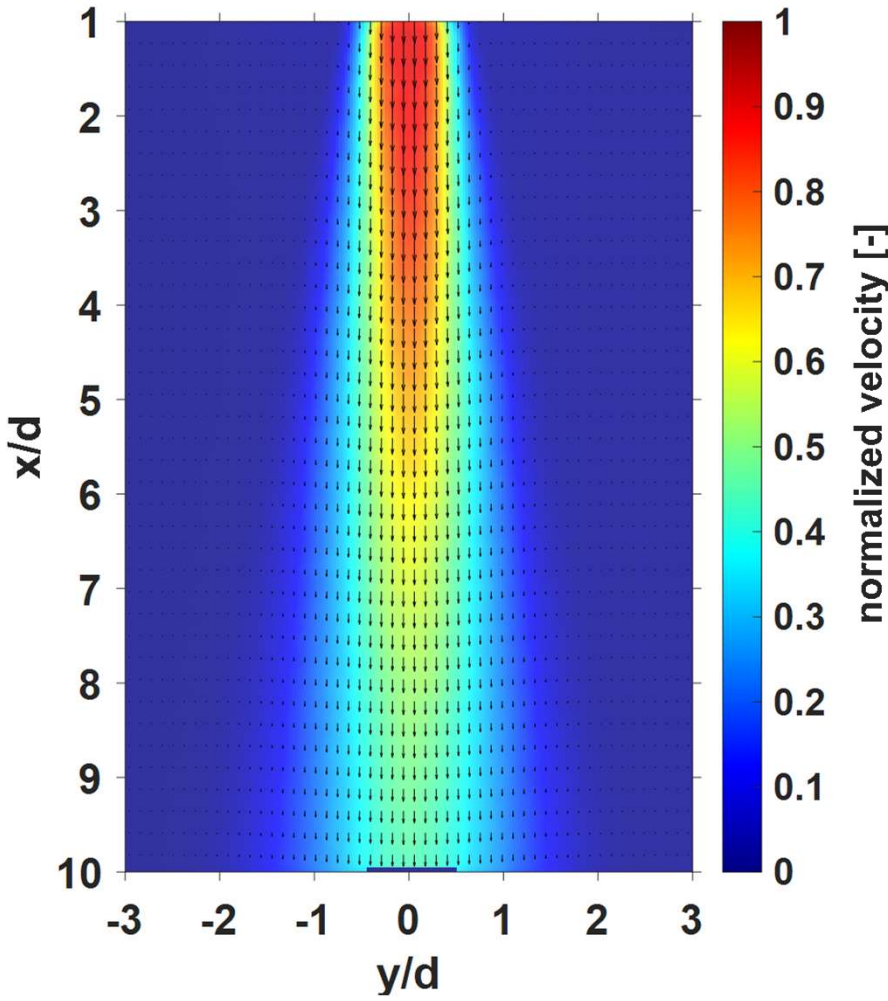

Jasper, S., Hussong, J., Lindken, R.,  
**PIV-Investigation of high-Reynoldsnumber submerged  
water jets at high pressure ambient conditions**  
Exp Fluids (2021), Springer.

sapphire nozzle SN1

$\sigma = 1.13$

normalized velocity field

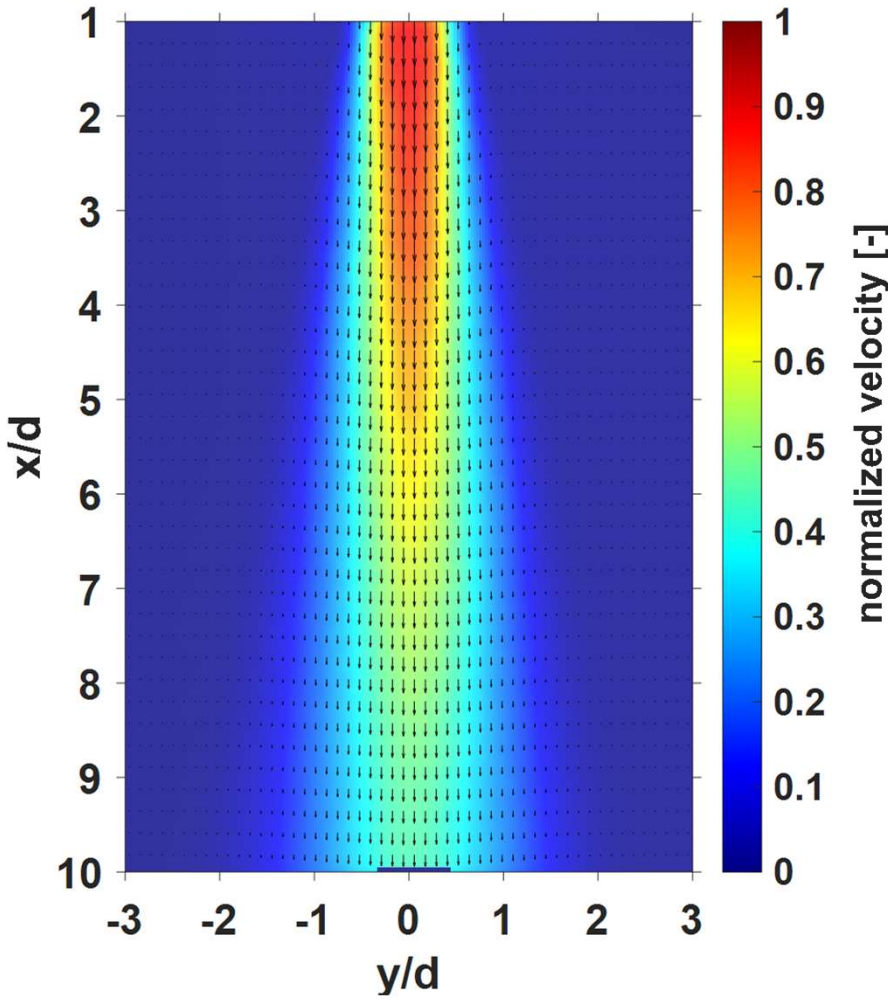

Jasper, S., Hussong, J., Lindken, R.,  
**PIV-Investigation of high-Reynoldsnumber submerged  
water jets at high pressure ambient conditions**  
Exp Fluids (2021), Springer.

sapphire nozzle SN1

$\sigma = 1.04$

normalized velocity field

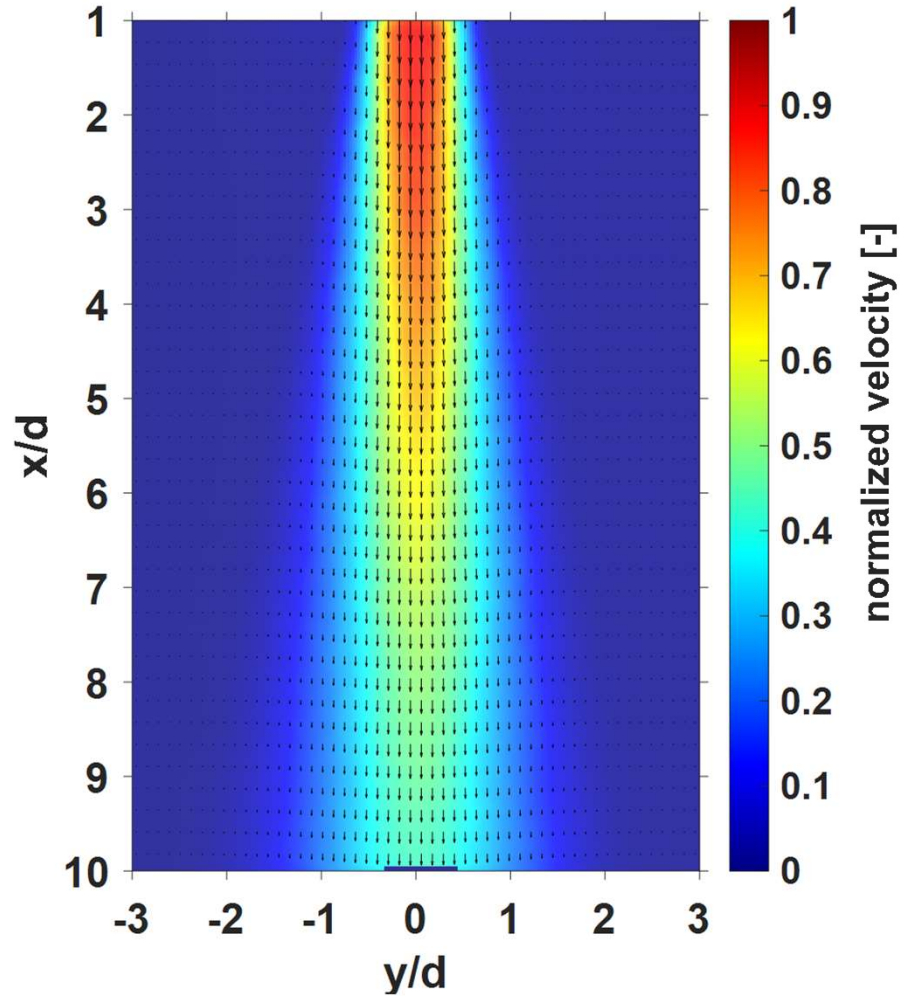

Jasper, S., Hussong, J., Lindken, R.,  
**PIV-Investigation of high-Reynoldsnumber submerged  
water jets at high pressure ambient conditions**  
Exp Fluids (2021), Springer.

sapphire nozzle SN1

$\sigma = 0.93$

normalized velocity field

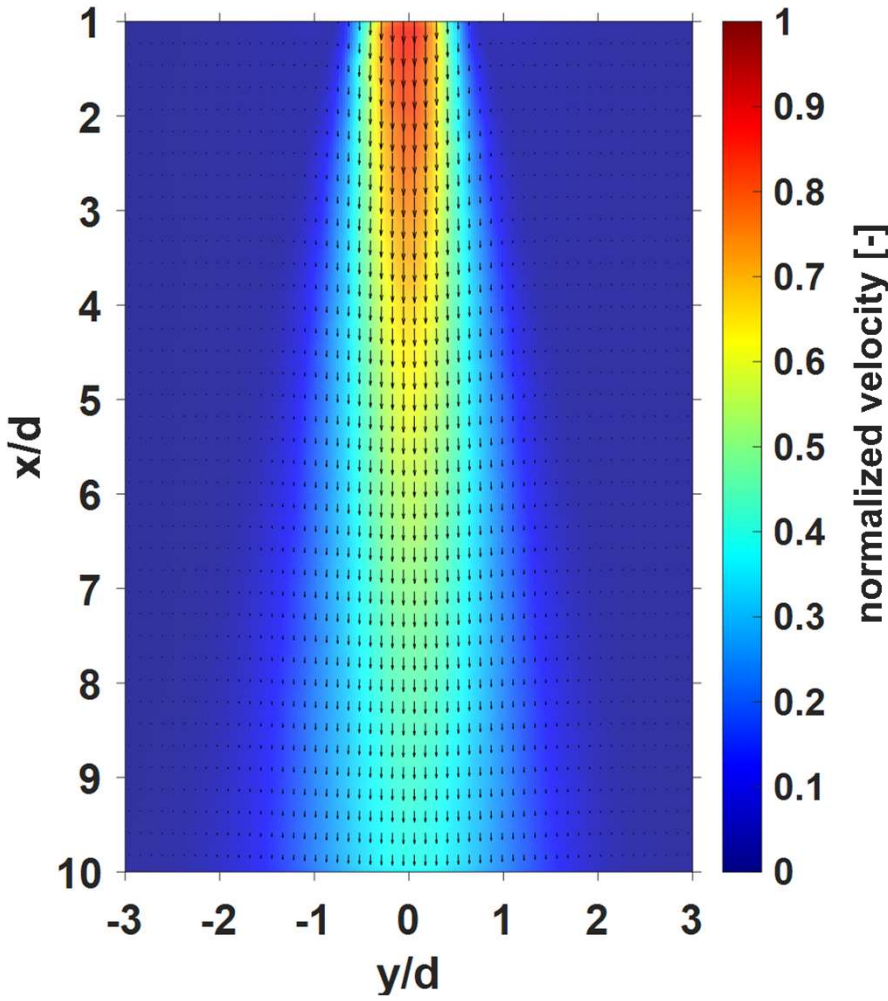

Jasper, S., Hussong, J., Lindken, R.,  
**PIV-Investigation of high-Reynoldsnumber submerged  
water jets at high pressure ambient conditions**  
Exp Fluids (2021), Springer.



sapphire nozzle SN1

$\sigma = 0.89$

normalized velocity field

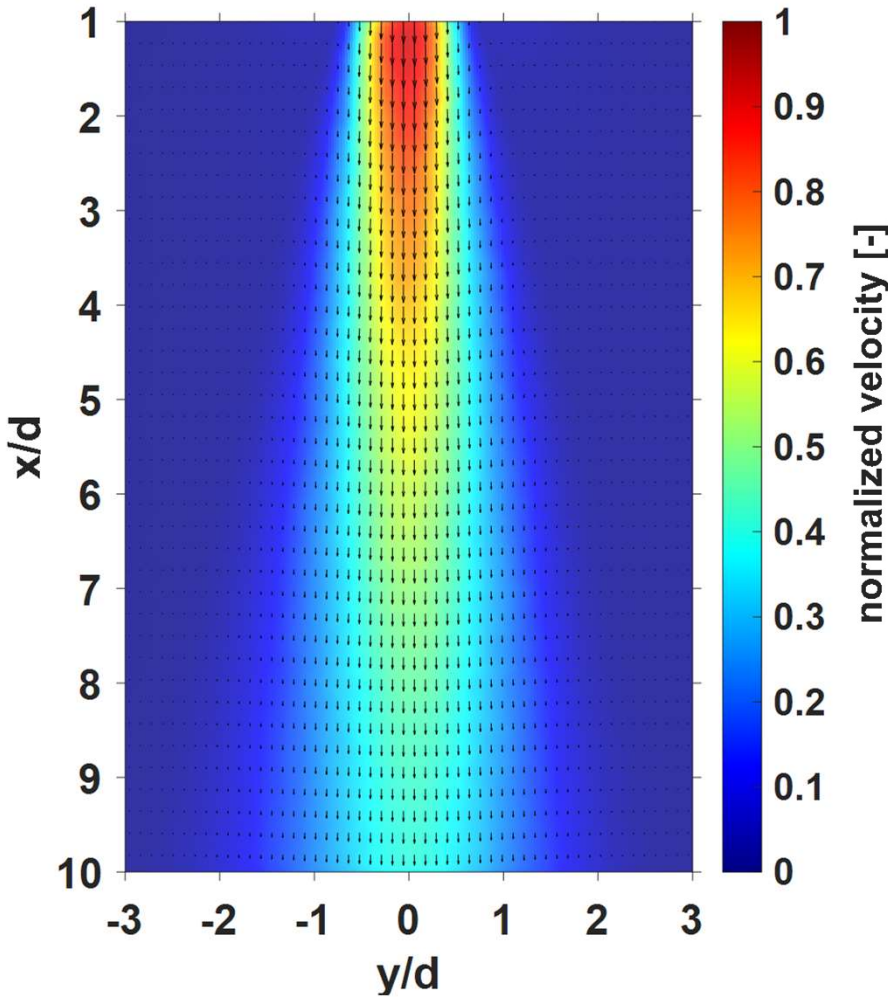

Jasper, S., Hussong, J., Lindken, R.,  
**PIV-Investigation of high-Reynoldsnumber submerged  
water jets at high pressure ambient conditions**  
Exp Fluids (2021), Springer.



sapphire nozzle SN1

$\sigma = 0.81$

normalized velocity field

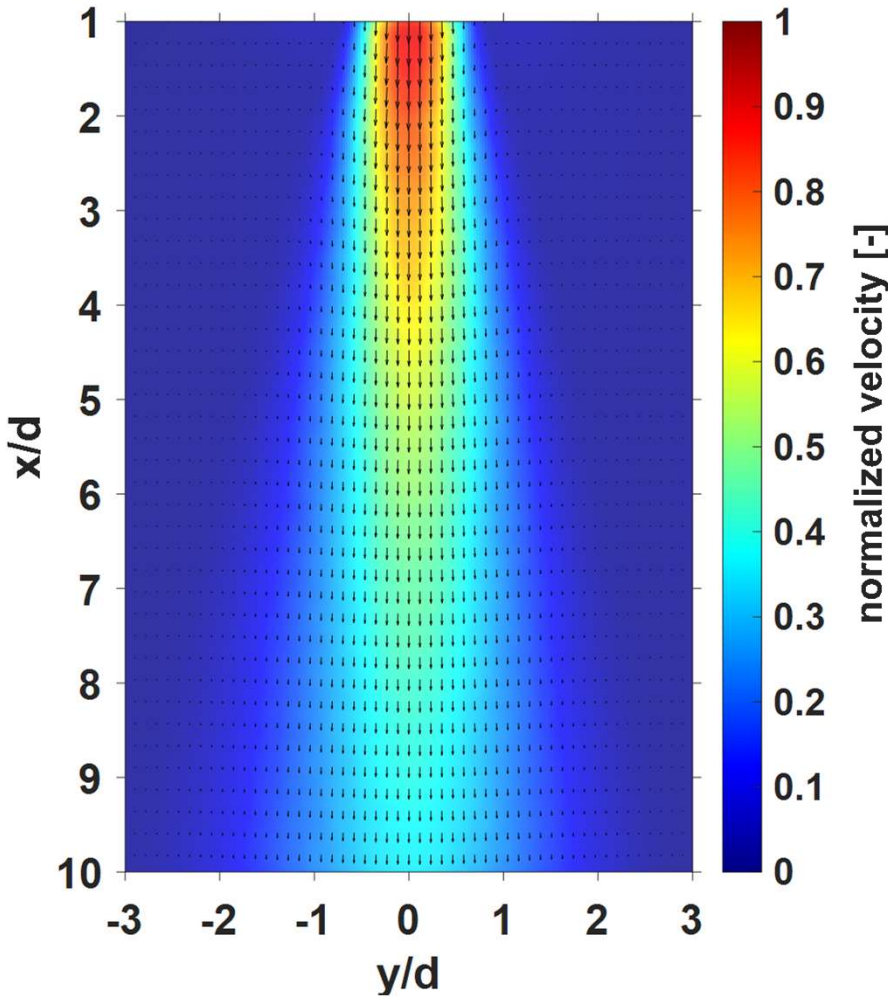

Jasper, S., Hussong, J., Lindken, R.,  
**PIV-Investigation of high-Reynoldsnumber submerged  
water jets at high pressure ambient conditions**  
Exp Fluids (2021), Springer.

sapphire nozzle SN1

$\sigma = 0.74$

normalized velocity field

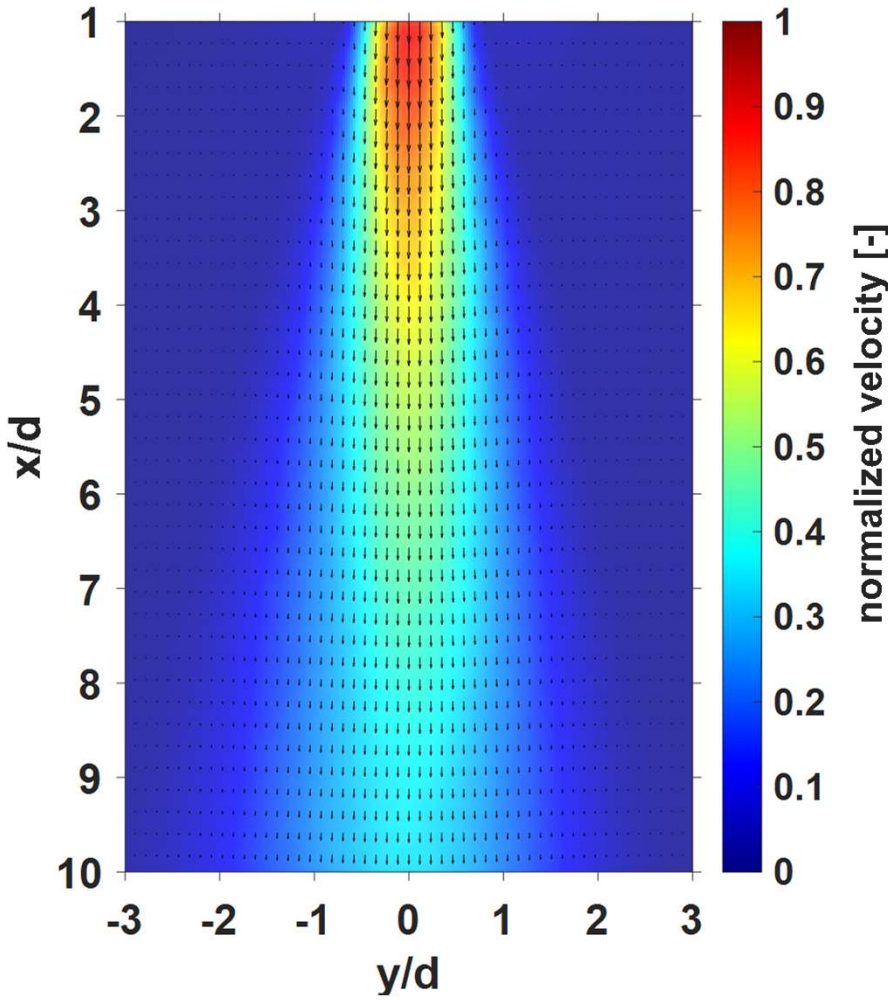

Jasper, S., Hussong, J., Lindken, R.,  
**PIV-Investigation of high-Reynoldsnumber submerged  
water jets at high pressure ambient conditions**  
Exp Fluids (2021), Springer.

sapphire nozzle SN1

$\sigma = 0.69$

normalized velocity field

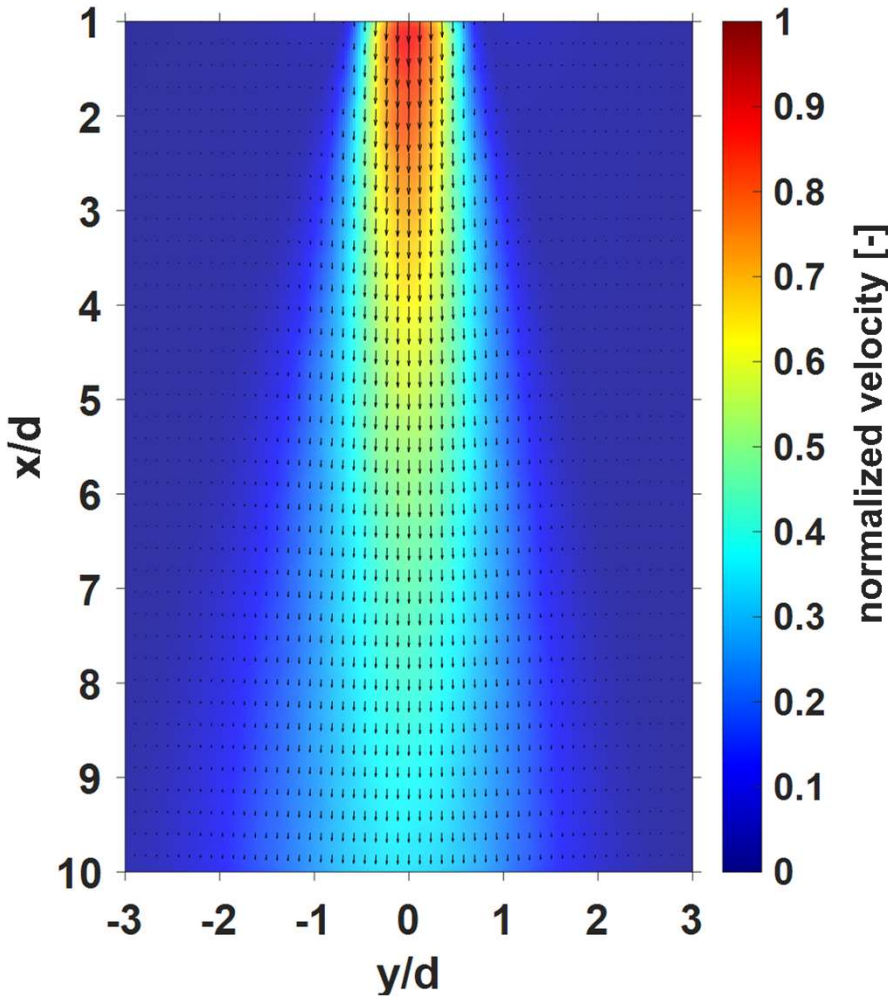

Jasper, S., Hussong, J., Lindken, R.,  
**PIV-Investigation of high-Reynoldsnumber submerged  
water jets at high pressure ambient conditions**  
Exp Fluids (2021), Springer.

sapphire nozzle SN1

$\sigma = 0.57$

normalized velocity field

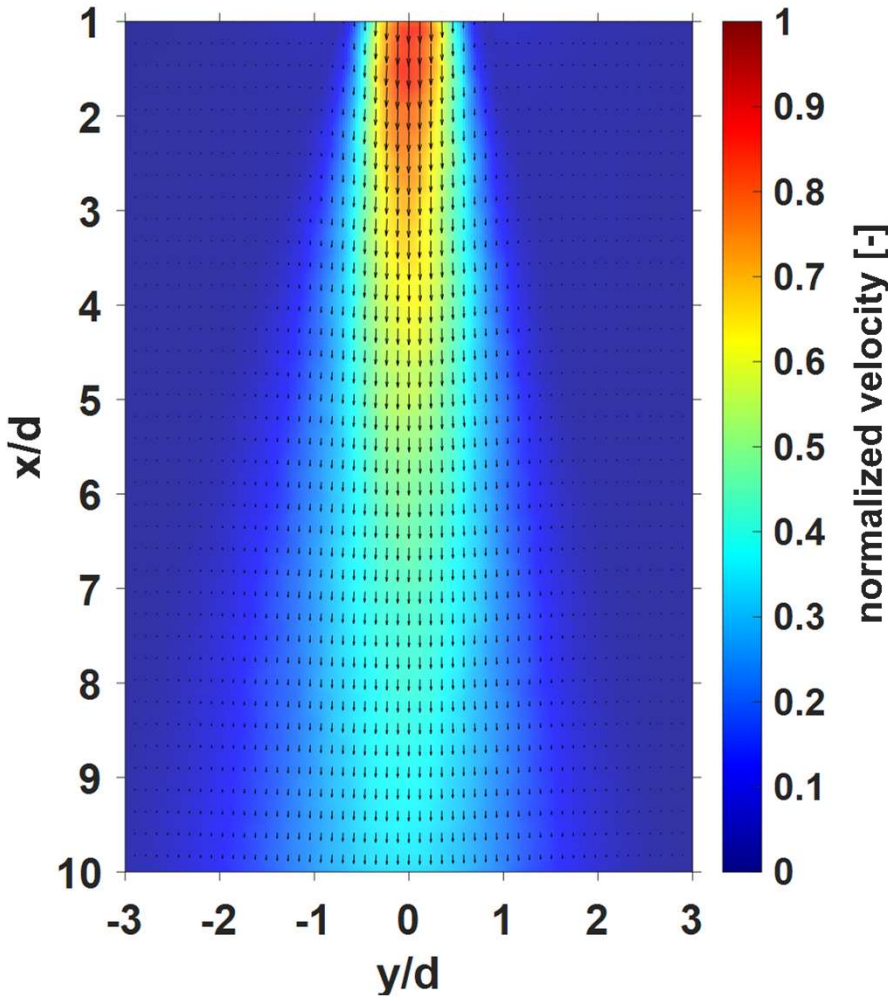

Jasper, S., Hussong, J., Lindken, R.,  
**PIV-Investigation of high-Reynoldsnumber submerged  
water jets at high pressure ambient conditions**  
Exp Fluids (2021), Springer.

sapphire nozzle SN1

$\sigma = 0.46$

normalized velocity field

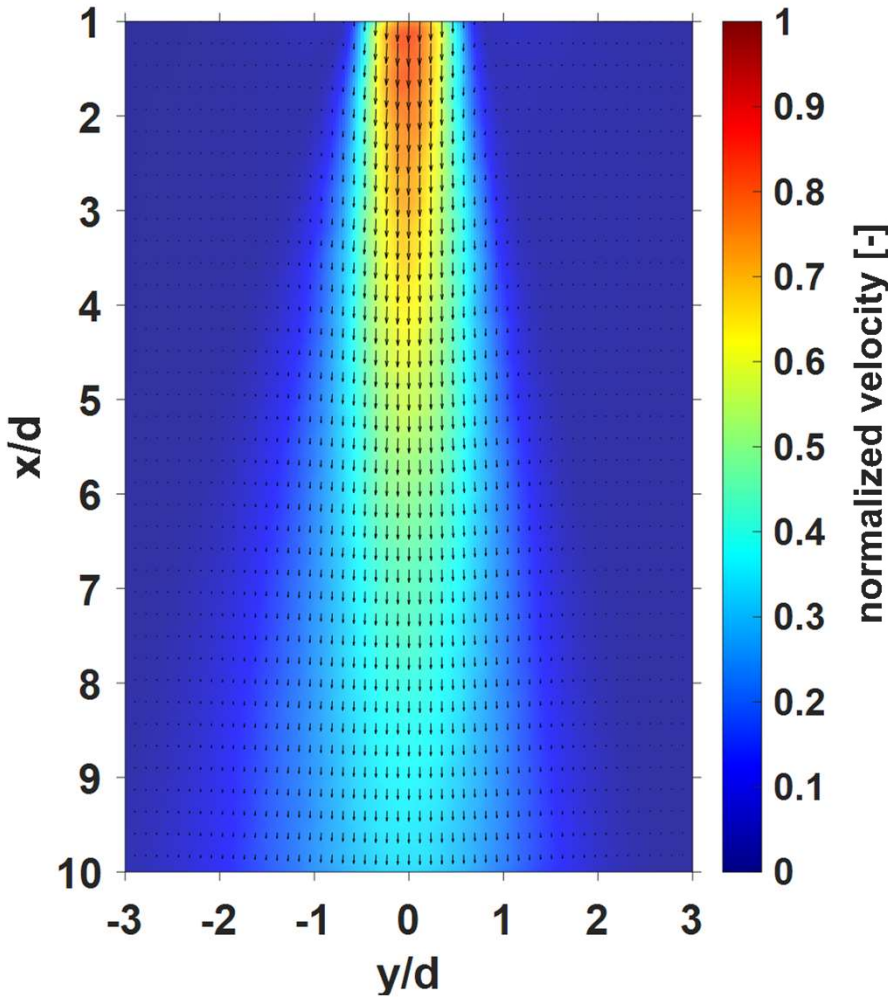

Jasper, S., Hussong, J., Lindken, R.,  
**PIV-Investigation of high-Reynoldsnumber submerged  
water jets at high pressure ambient conditions**  
Exp Fluids (2021), Springer.



sapphire nozzle SN1

$\sigma = 0.36$

normalized velocity field

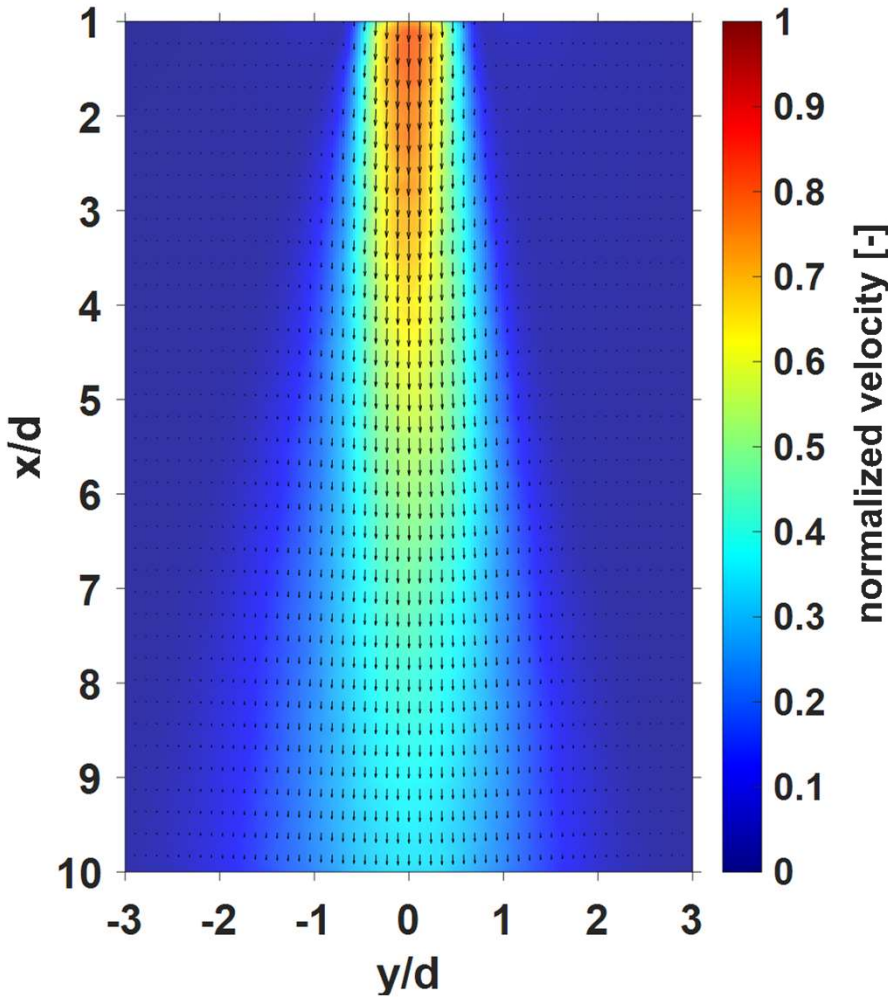

Jasper, S., Hussong, J., Lindken, R.,  
**PIV-Investigation of high-Reynoldsnumber submerged  
water jets at high pressure ambient conditions**  
Exp Fluids (2021), Springer.
