# Supplementary material for: PIV investigation of high Reynolds number submerged water jets at high-pressure ambient conditions
Source: Springer Nature journal article supplement (doi:10.1007/s00348-021-03167-x), 2021-04-15
Supplement: MOESM3 [file 348_2021_3167_MOESM3_ESM.pdf]

Jasper, S., Hussong, J., Lindken, R.,  
**PIV-Investigation of high-Reynoldsnumber submerged  
water jets at high pressure ambient conditions**  
Exp Fluids (2021), Springer.

### **Supplementary Material C**

- conical nozzle CN
- cavitation numbers  $\sigma = 0.33 - 2.34$
- 2D normalized velocity fields

### **Sarah Jasper**

Bochum University of Applied Sciences  
Institute for Thermodynamics and Fluid Mechanics  
Am Hochschulcampus 1  
44801 Bochum  
Germany  
t: +49 234 32 10432  
e: sarah.jasper@hs-bochum.de

### **Jeanette Hussong**

Technical University of Darmstadt  
Fluid Mechanics and Aerodynamics  
Darmstadt  
Germany

### **Ralph Lindken**

Bochum University of Applied Sciences  
Institute for Thermodynamics and Fluid Mechanics  
Bochum  
Germany

conical nozzle CN

$\sigma = 2.34$

normalized velocity field

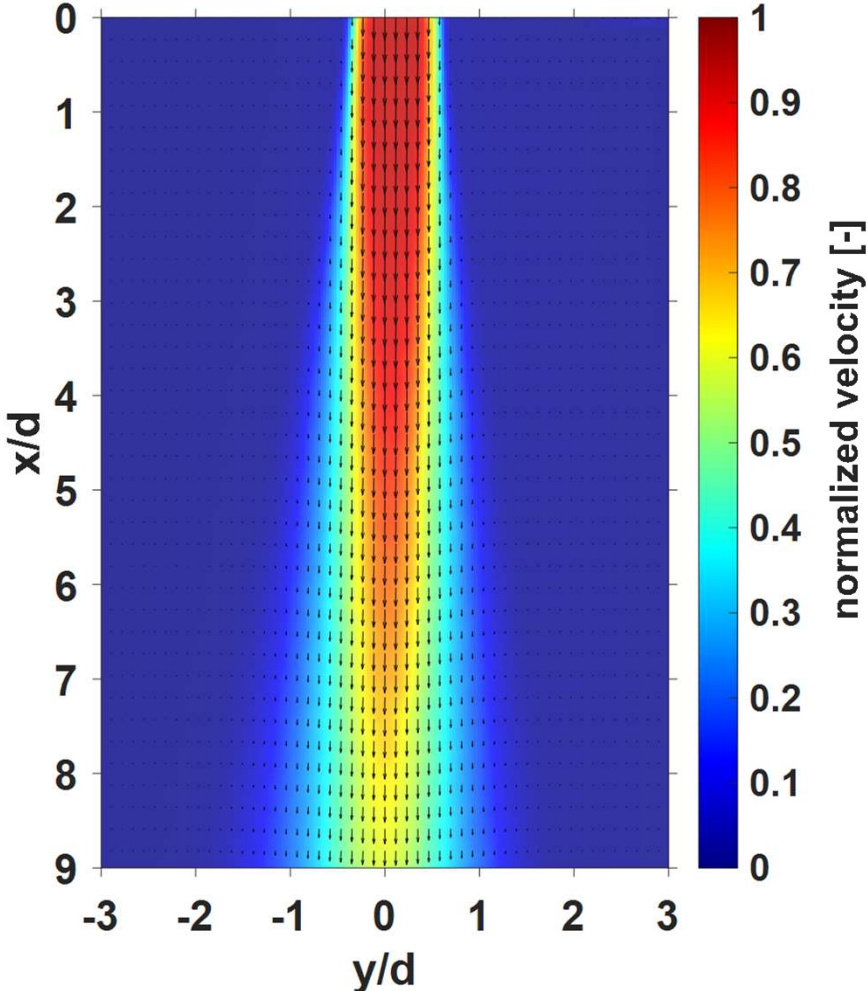

Jasper, S., Hussong, J., Lindken, R.,  
**PIV-Investigation of high-Reynoldsnumber submerged  
water jets at high pressure ambient conditions**  
Exp Fluids (2021), Springer.

conical nozzle CN

$\sigma = 2.05$

normalized velocity field

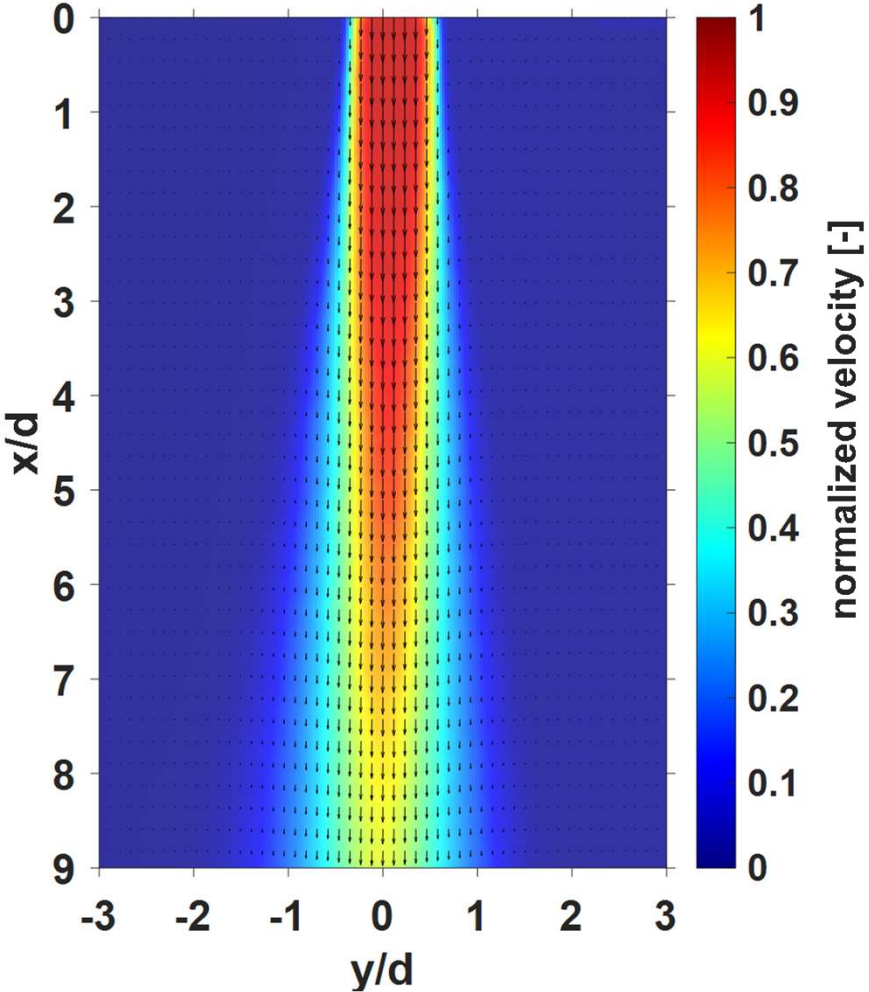

Jasper, S., Hussong, J., Lindken, R.,  
**PIV-Investigation of high-Reynoldsnumber submerged  
water jets at high pressure ambient conditions**  
Exp Fluids (2021), Springer.

conical nozzle CN

$\sigma = 1.96$

normalized velocity field

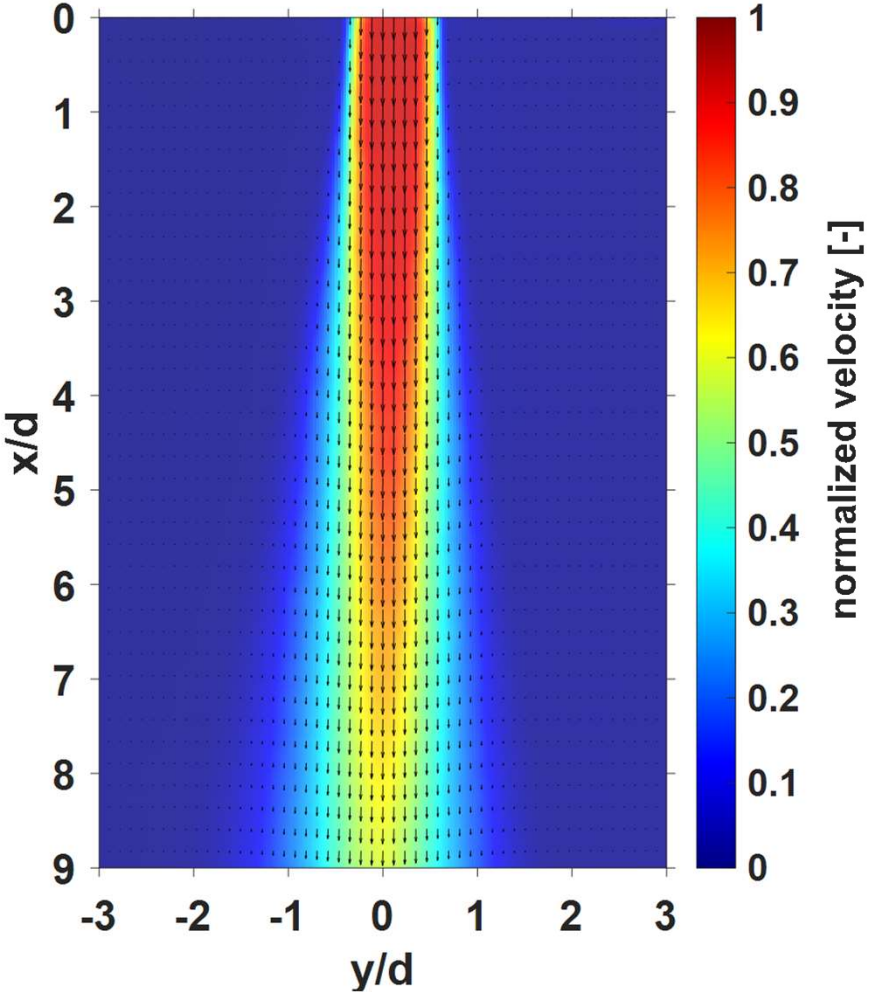

Jasper, S., Hussong, J., Lindken, R.,  
**PIV-Investigation of high-Reynoldsnumber submerged  
water jets at high pressure ambient conditions**  
Exp Fluids (2021), Springer.

conical nozzle CN

$\sigma = 1.74$

normalized velocity field

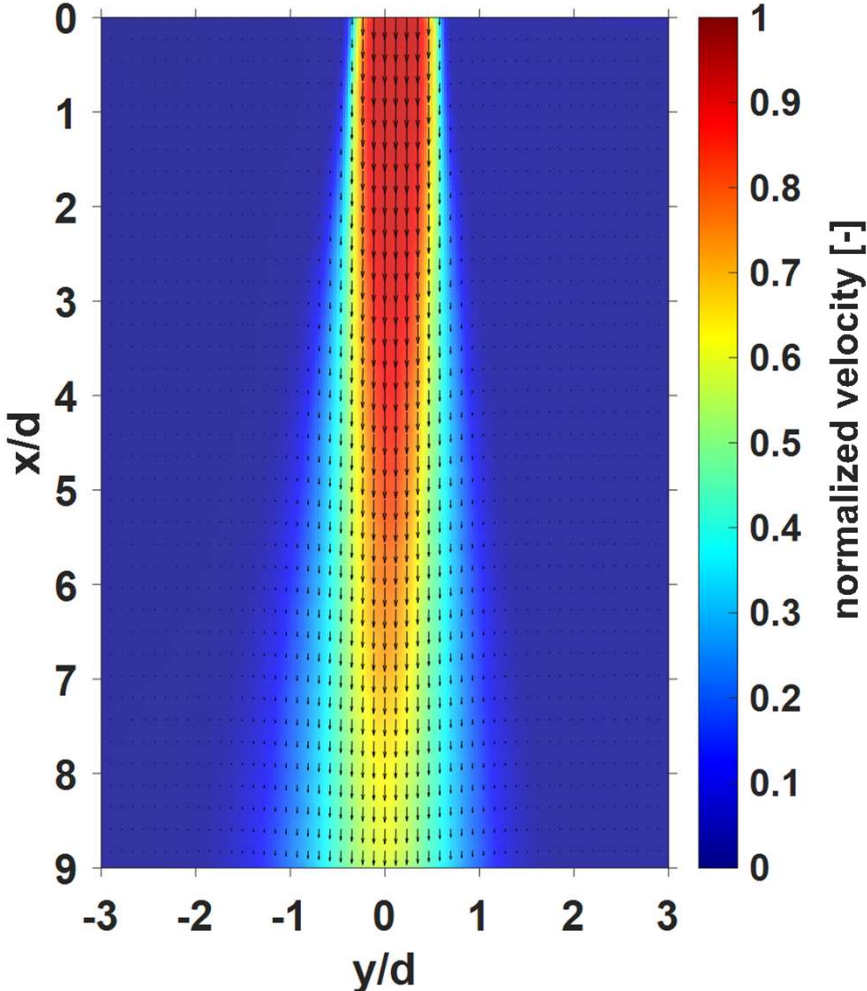

Jasper, S., Hussong, J., Lindken, R.,  
**PIV-Investigation of high-Reynoldsnumber submerged  
water jets at high pressure ambient conditions**  
Exp Fluids (2021), Springer.

conical nozzle CN

$$\sigma = 1.72$$

normalized velocity field

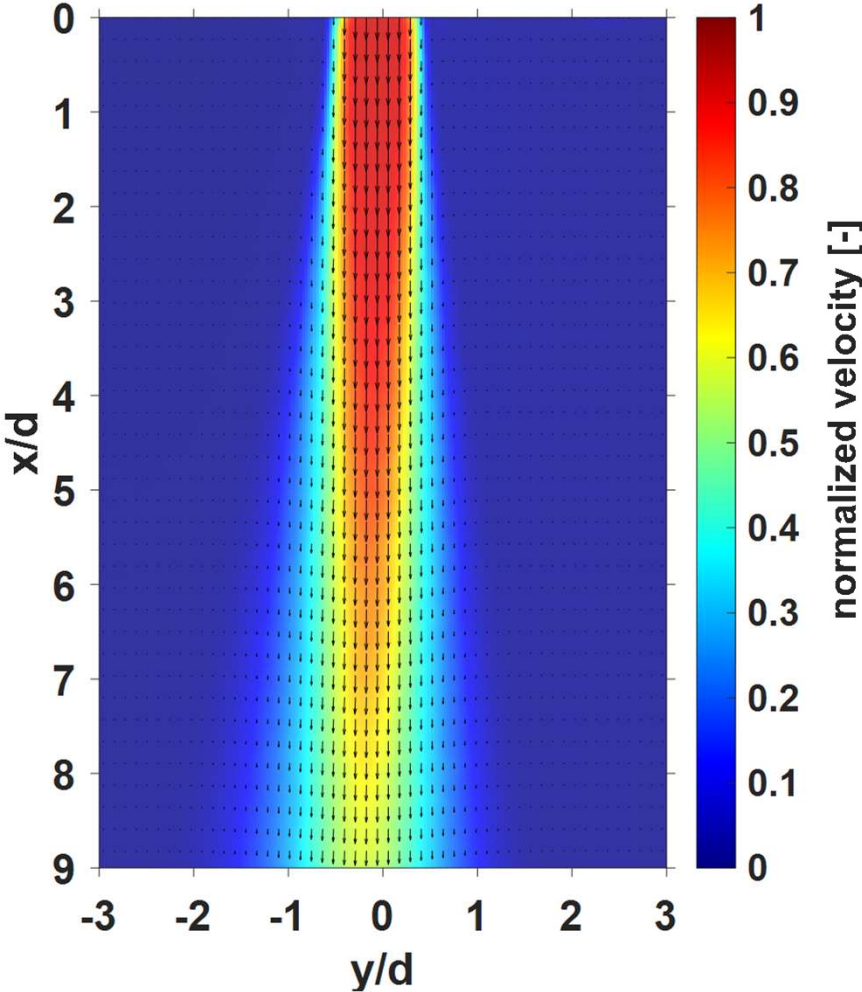

Jasper, S., Hussong, J., Lindken, R.,  
**PIV-Investigation of high-Reynoldsnumber submerged  
water jets at high pressure ambient conditions**  
Exp Fluids (2021), Springer.

conical nozzle CN

$\sigma = 1.55$

normalized velocity field

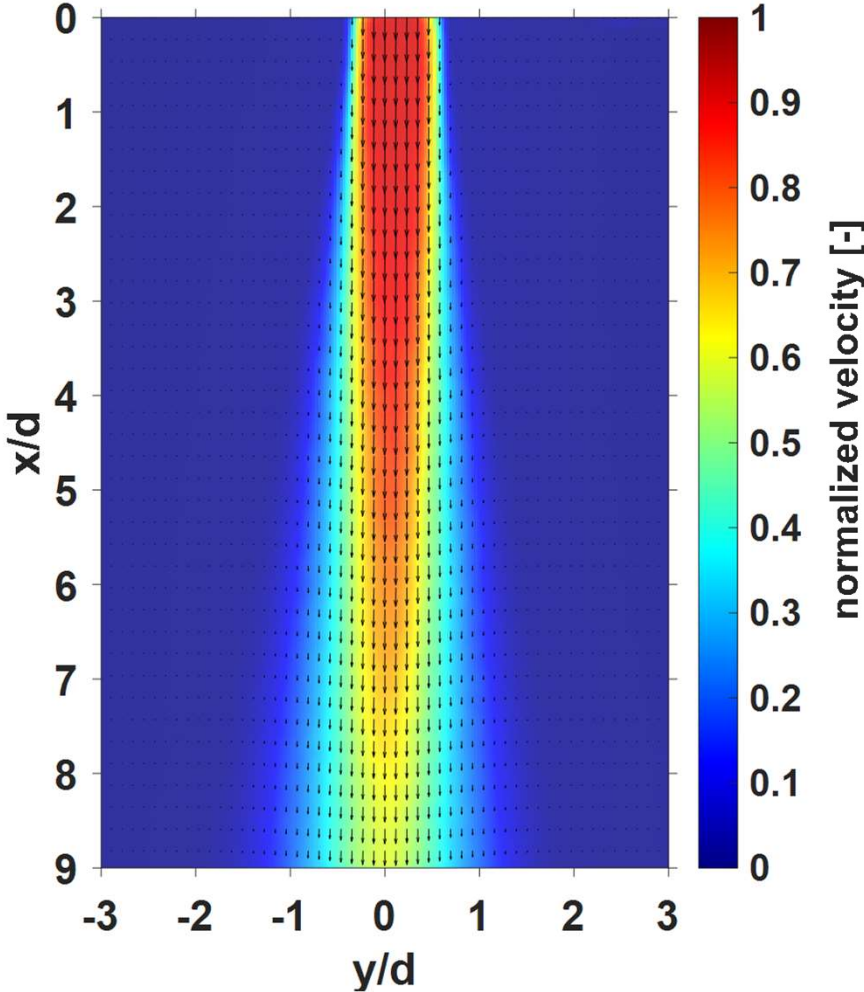

Jasper, S., Hussong, J., Lindken, R.,  
**PIV-Investigation of high-Reynoldsnumber submerged  
water jets at high pressure ambient conditions**  
Exp Fluids (2021), Springer.



conical nozzle CN

$\sigma = 1.34$

normalized velocity field

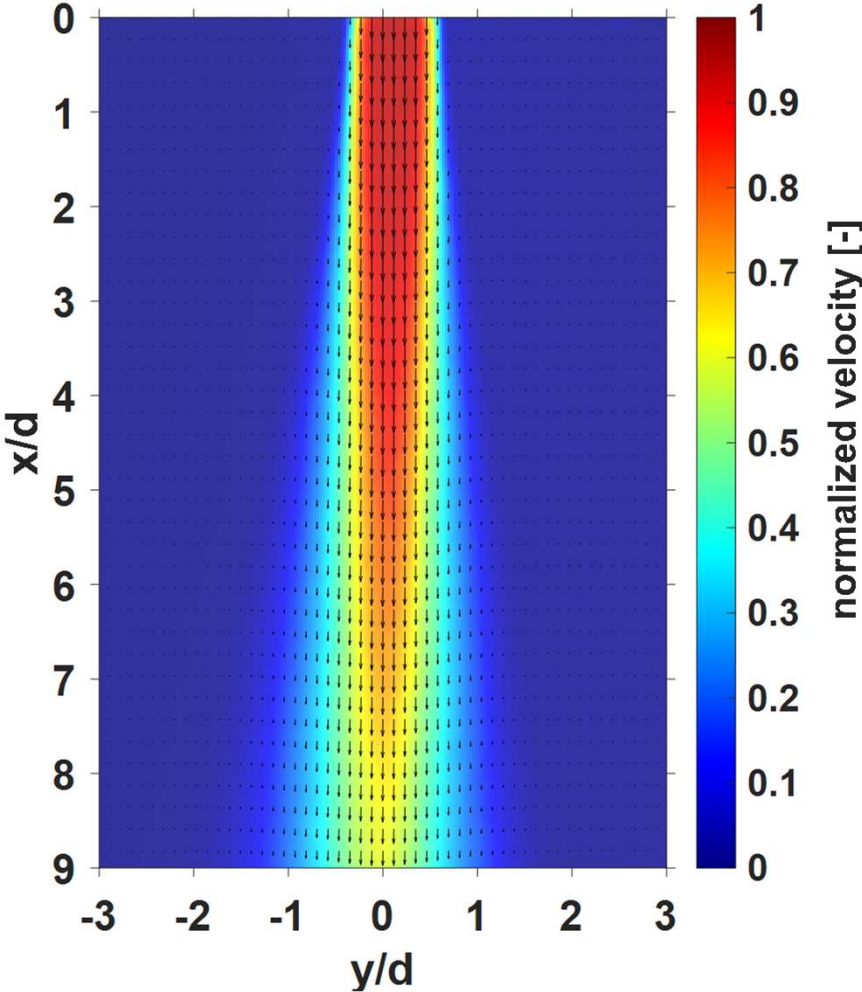

Jasper, S., Hussong, J., Lindken, R.,  
**PIV-Investigation of high-Reynoldsnumber submerged  
water jets at high pressure ambient conditions**  
Exp Fluids (2021), Springer.



conical nozzle CN

$\sigma = 1.26$

normalized velocity field

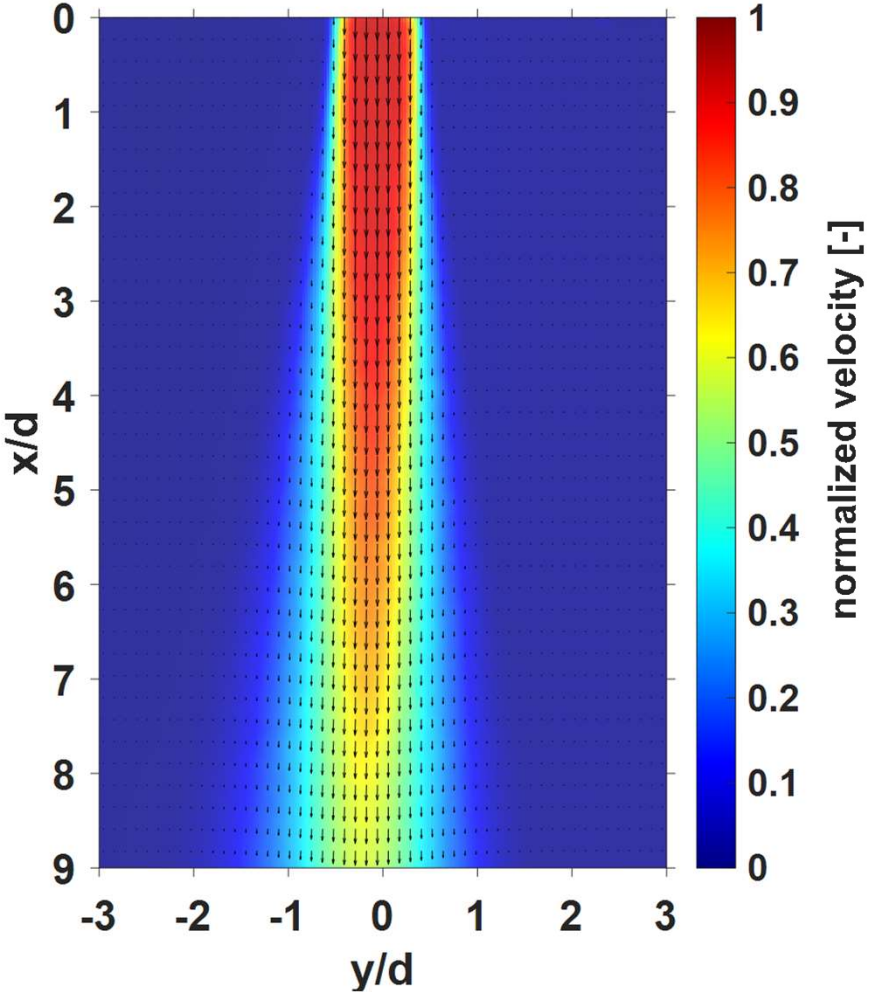

Jasper, S., Hussong, J., Lindken, R.,  
**PIV-Investigation of high-Reynoldsnumber submerged  
water jets at high pressure ambient conditions**  
Exp Fluids (2021), Springer.

conical nozzle CN

$\sigma = 1.20$

normalized velocity field

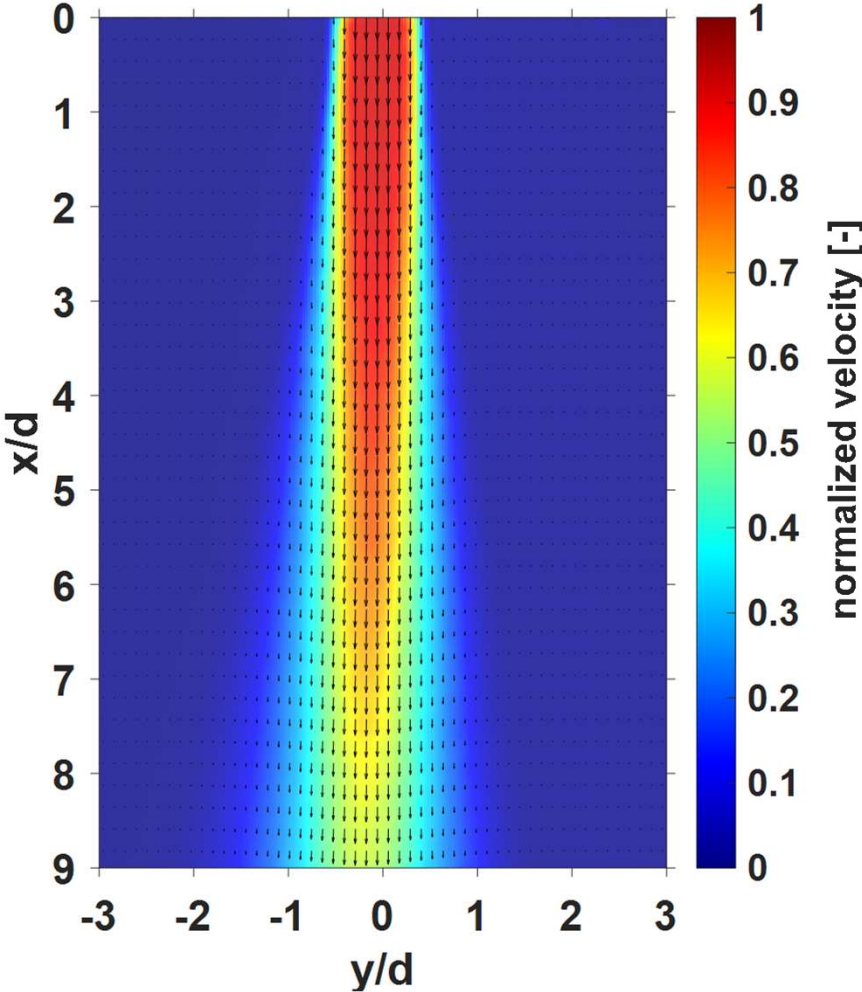

Jasper, S., Hussong, J., Lindken, R.,  
**PIV-Investigation of high-Reynoldsnumber submerged  
water jets at high pressure ambient conditions**  
Exp Fluids (2021), Springer.

conical nozzle CN

$\sigma = 1.07$

normalized velocity field

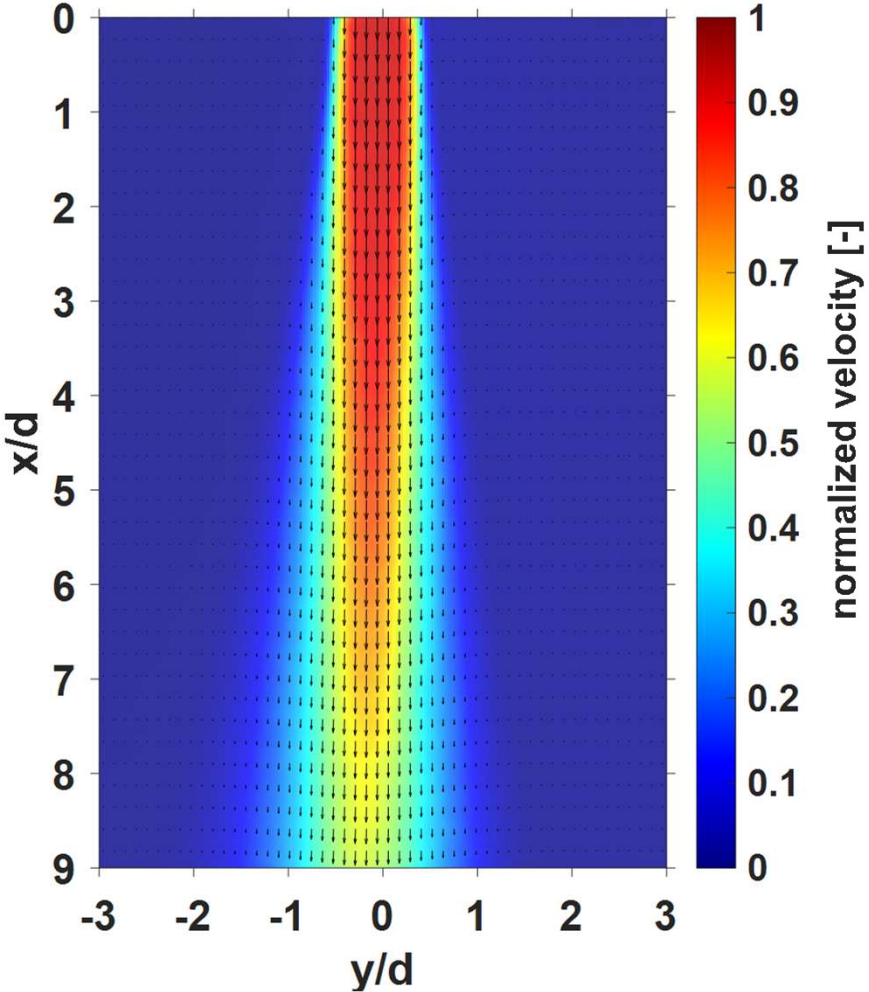

Jasper, S., Hussong, J., Lindken, R.,  
**PIV-Investigation of high-Reynoldsnumber submerged  
water jets at high pressure ambient conditions**  
Exp Fluids (2021), Springer.

conical nozzle CN

$\sigma = 0.99$

normalized velocity field

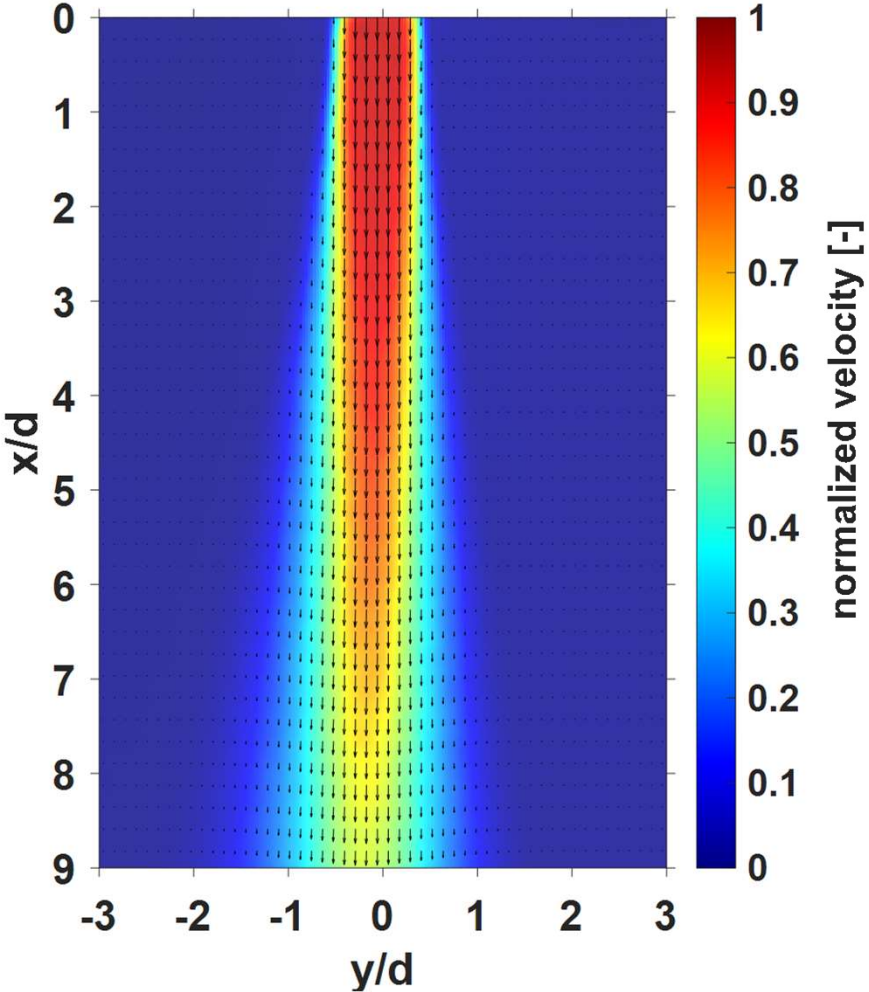

Jasper, S., Hussong, J., Lindken, R.,  
**PIV-Investigation of high-Reynoldsnumber submerged  
water jets at high pressure ambient conditions**  
Exp Fluids (2021), Springer.

conical nozzle CN

$\sigma = 0.91$

normalized velocity field

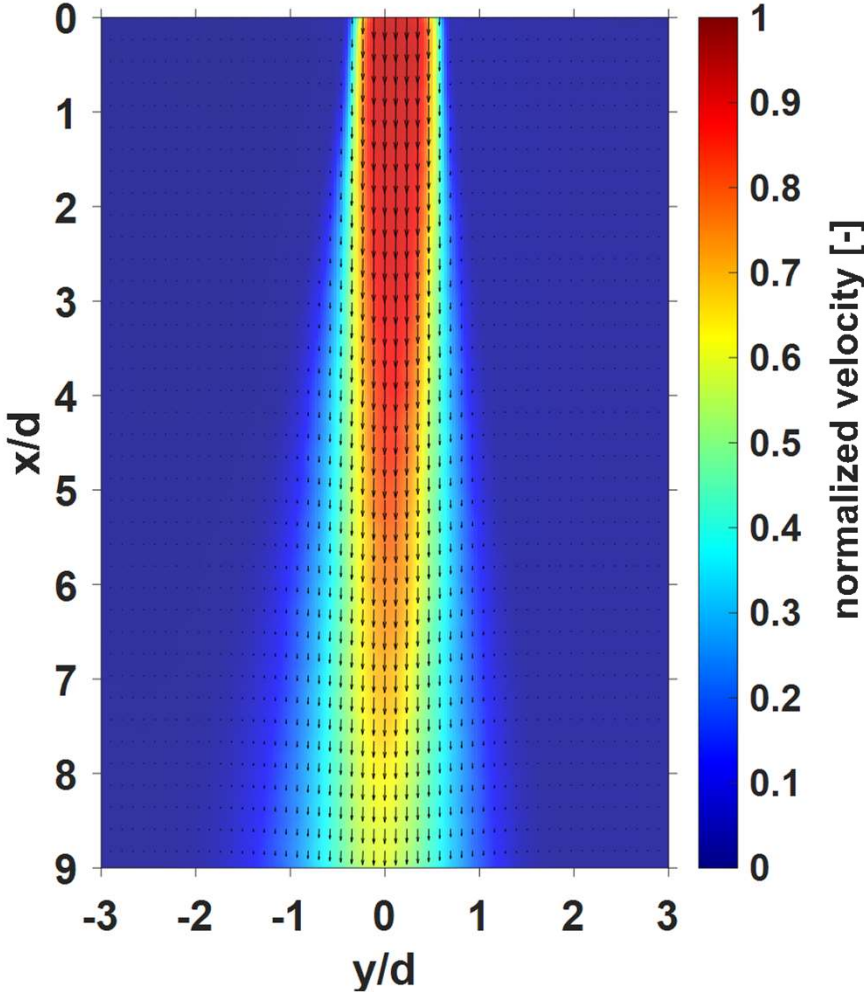

Jasper, S., Hussong, J., Lindken, R.,  
**PIV-Investigation of high-Reynoldsnumber submerged  
water jets at high pressure ambient conditions**  
Exp Fluids (2021), Springer.

conical nozzle CN

$\sigma = 0.82$

normalized velocity field

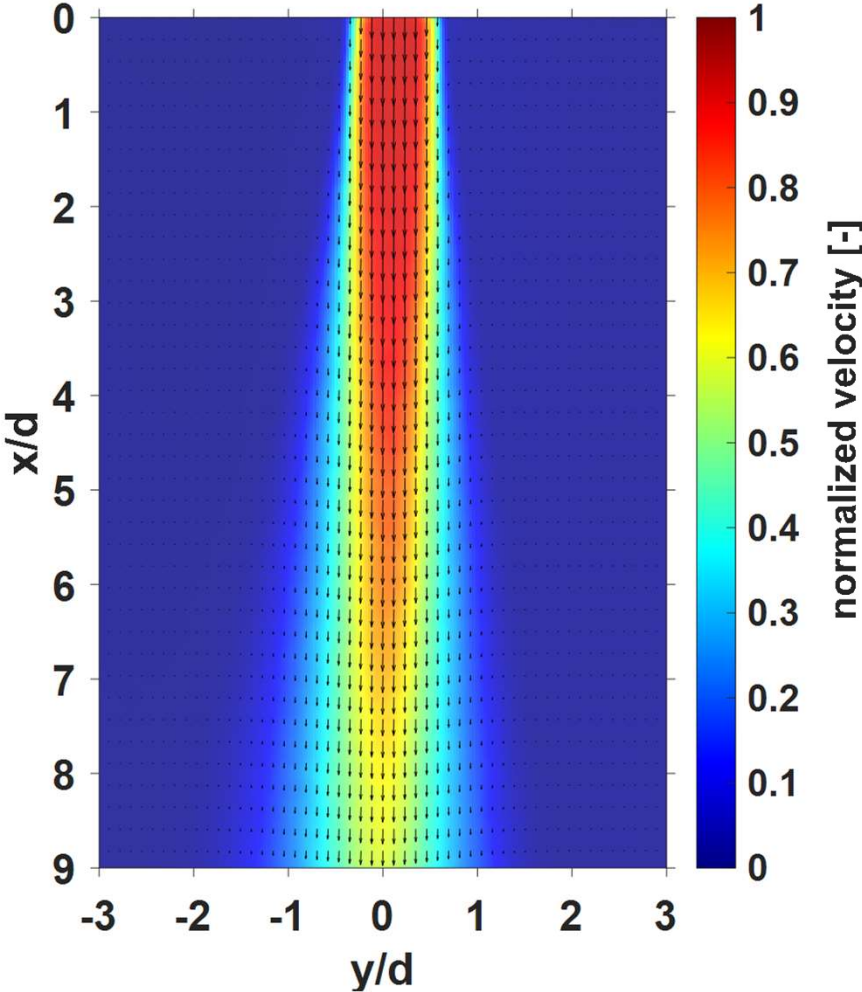

Jasper, S., Hussong, J., Lindken, R.,  
**PIV-Investigation of high-Reynoldsnumber submerged  
water jets at high pressure ambient conditions**  
Exp Fluids (2021), Springer.



conical nozzle CN

$\sigma = 0.77$

normalized velocity field

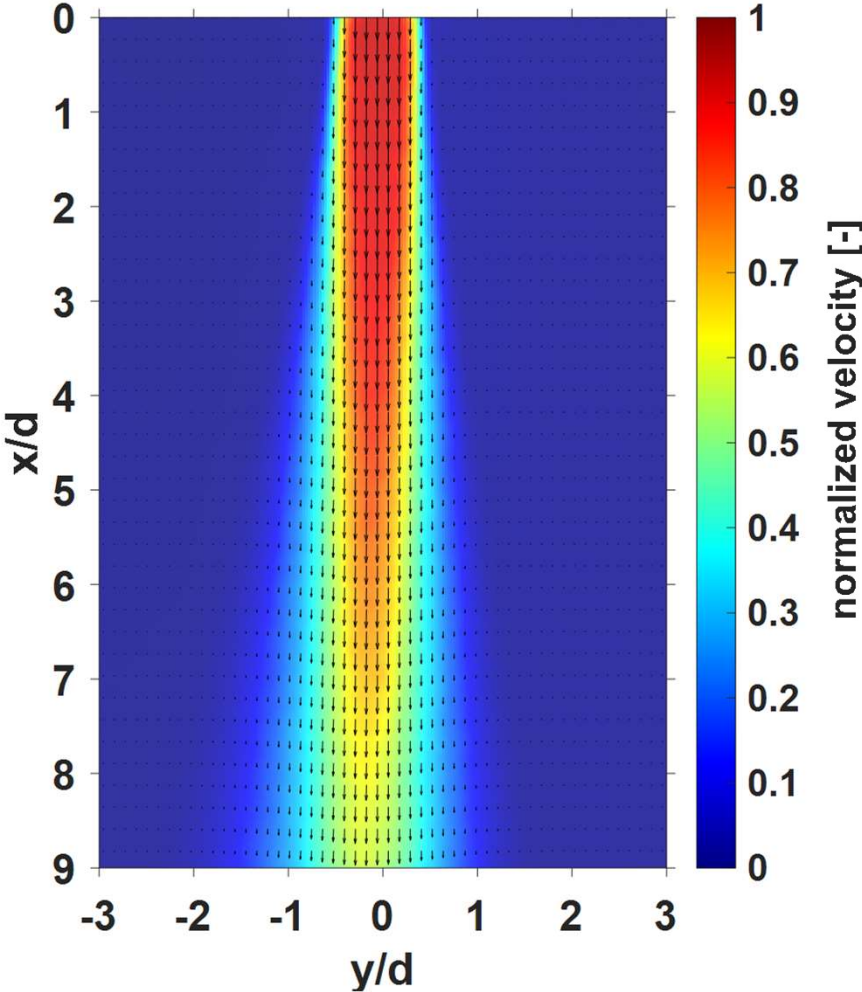

Jasper, S., Hussong, J., Lindken, R.,  
**PIV-Investigation of high-Reynoldsnumber submerged  
water jets at high pressure ambient conditions**  
Exp Fluids (2021), Springer.



conical nozzle CN

$\sigma = 0.74$

normalized velocity field

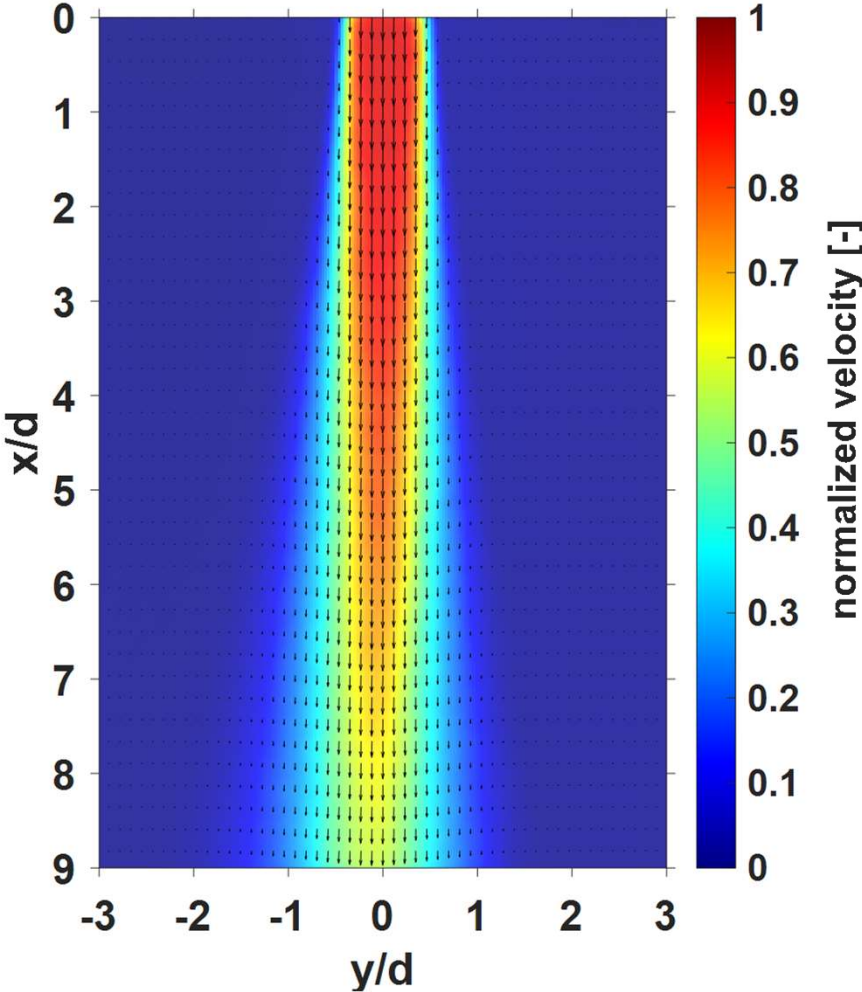

Jasper, S., Hussong, J., Lindken, R.,  
**PIV-Investigation of high-Reynoldsnumber submerged  
water jets at high pressure ambient conditions**  
Exp Fluids (2021), Springer.

conical nozzle CN

$\sigma = 0.54$

normalized velocity field

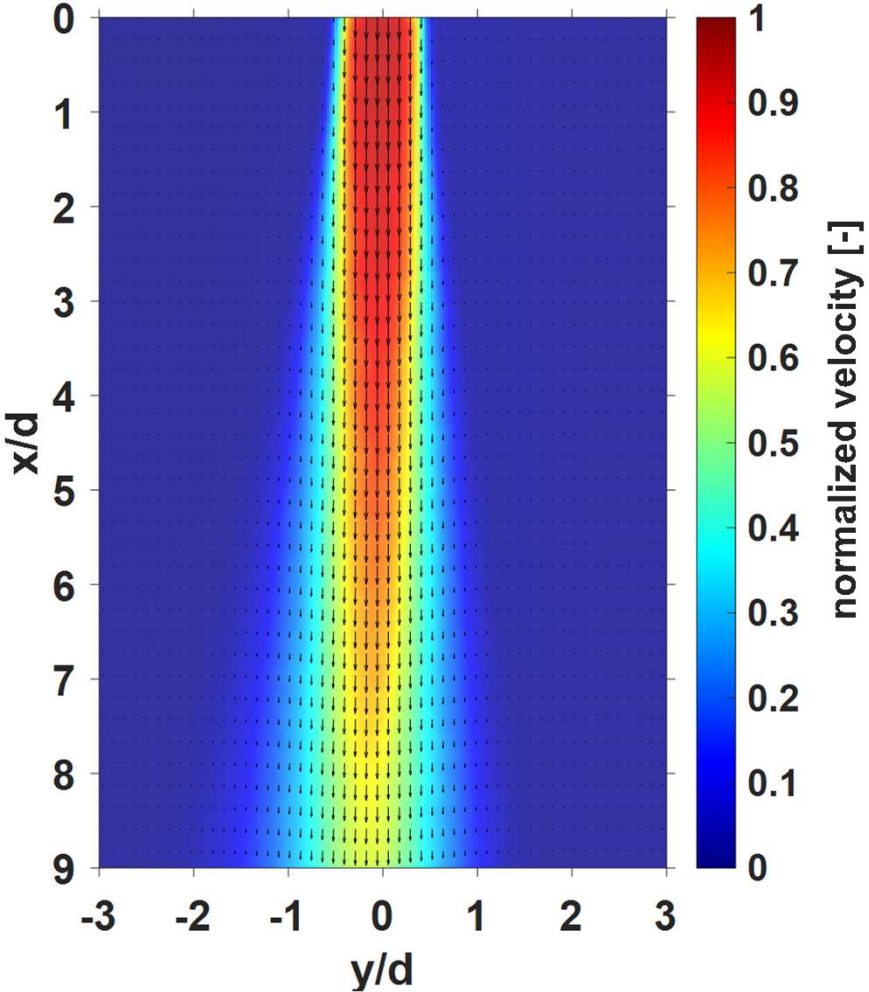

Jasper, S., Hussong, J., Lindken, R.,  
**PIV-Investigation of high-Reynoldsnumber submerged  
water jets at high pressure ambient conditions**  
Exp Fluids (2021), Springer.

conical nozzle CN

$\sigma = 0.46$

normalized velocity field

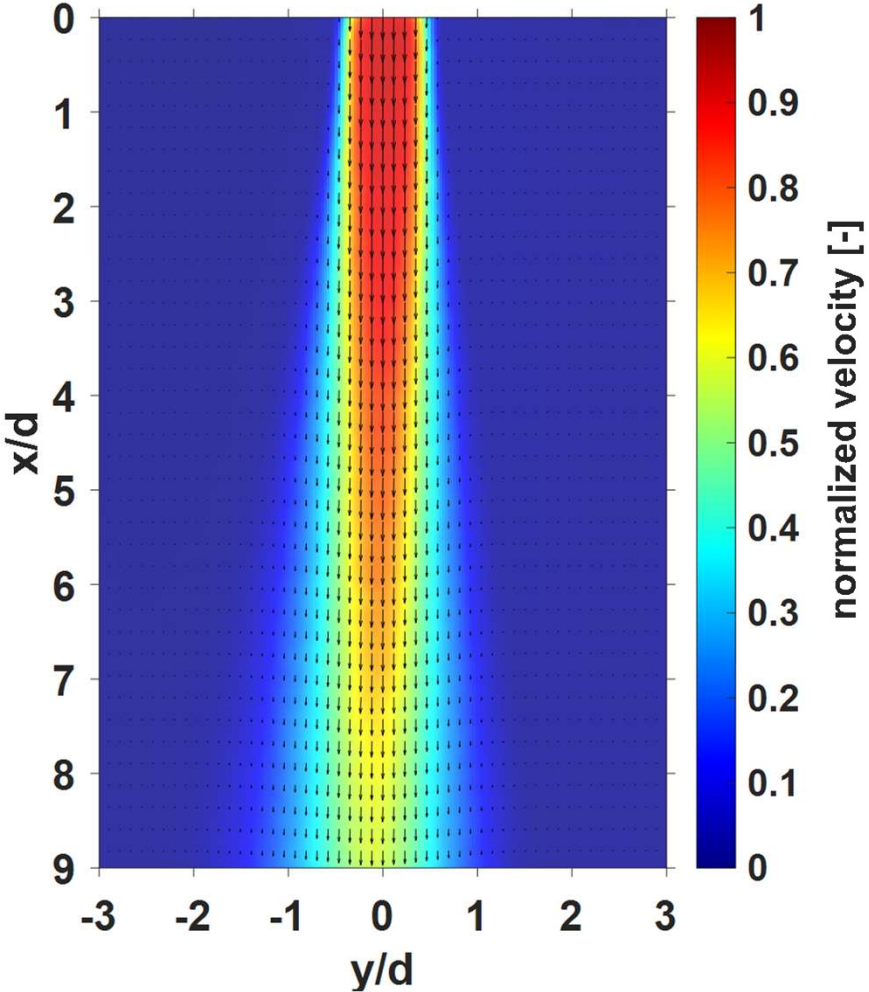

Jasper, S., Hussong, J., Lindken, R.,  
**PIV-Investigation of high-Reynoldsnumber submerged  
water jets at high pressure ambient conditions**  
Exp Fluids (2021), Springer.

conical nozzle CN

$\sigma = 0.33$

normalized velocity field

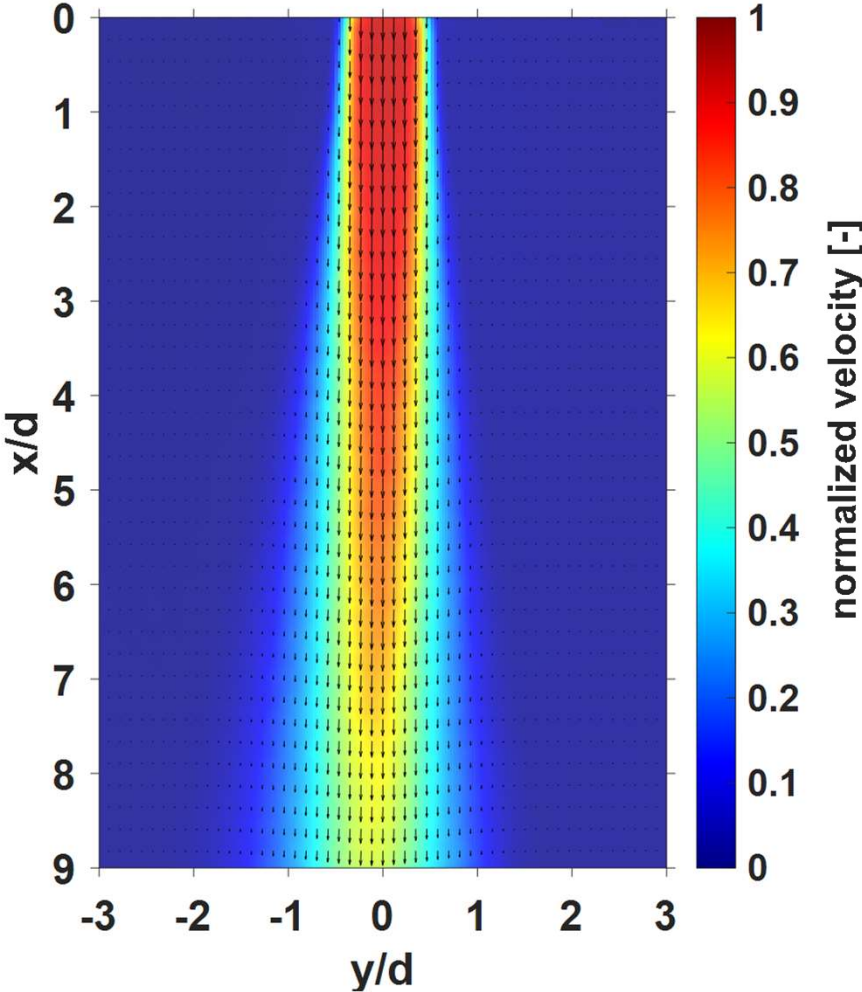

Jasper, S., Hussong, J., Lindken, R.,  
**PIV-Investigation of high-Reynoldsnumber submerged  
water jets at high pressure ambient conditions**  
Exp Fluids (2021), Springer.
